# Supplementary material for: New Dimeric Members of the Phomoxanthone Family: Phomolactonexanthones A, B and Deacetylphomoxanthone C Isolated from the Fungus Phomopsis sp
Source: PubMed Central journal article supplement (PMC3877896; doi:10.3390/md11124961), 2013-12-11

## Supplementary Information

**Table S1.** NMR data for compounds **1** (500 MHz, in chloroform-*d*).

**Table S2.** NMR data for compounds **2**.

**Table S3.** NMR data for compounds **3**.

**Figure S1.**  $^1\text{H}$ ,  $^{13}\text{C}$ , Dept 135,  $^1\text{H}$ - $^1\text{H}$  COSY, HSQC, HMBC, NOE of compound **1**.

**Figure S2.** HRESIMS of compound **1**.

**Figure S3.** IR of compound **1**.

**Figure S4.** UV of compound **1**.

**Figure S5.**  $^1\text{H}$ ,  $^{13}\text{C}$ ,  $^1\text{H}$ - $^1\text{H}$  COSY, HSQC, HMBC, NOE of compound **2**.

**Figure S6.** HRESIMS of compound **2**.

**Figure S7.** IR of compound **2**.

**Figure S8.** UV of compound **2**.

**Figure S9.**  $^1\text{H}$ ,  $^{13}\text{C}$ , Dept 135,  $^1\text{H}$ - $^1\text{H}$  COSY, HSQC, HMBC, NOE of compound **3**.

**Figure S10.** HRESIMS of compound **3**.

**Figure S11.** IR of compound **3**.

**Figure S12.** UV of compound **3**.

**Figure S13.**  $^1\text{H}$ ,  $^{13}\text{C}$ ,  $^1\text{H}$ - $^1\text{H}$  COSY, HSQC, HMBC, NOE of compound **4**.

**Figure S14.**  $^1\text{H}$ ,  $^{13}\text{C}$ ,  $^1\text{H}$ - $^1\text{H}$  COSY, HSQC, HMBC, NOE of compound **5**.

**Figure S15.**  $^1\text{H}$ ,  $^{13}\text{C}$ ,  $^1\text{H}$ - $^1\text{H}$  COSY, HSQC, HMBC, NOE of compound **6**.

**Figure S16.**  $^1\text{H}$ ,  $^{13}\text{C}$ ,  $^1\text{H}$ - $^1\text{H}$  COSY, HSQC, HMBC, NOE of compound **7**.

**Figure S17.**  $^1\text{H}$ ,  $^{13}\text{C}$ ,  $^1\text{H}$ - $^1\text{H}$  COSY, HSQC, HMBC, NOE of compound **8**.

**Table S1.** NMR data for compounds **1** (500 MHz, in chloroform-*d*).

| Position     | $\delta_C$ , Type     | $\delta_H$ , Mult. (J in Hz) | HMBC(H→C)          | COSY             |
|--------------|-----------------------|------------------------------|--------------------|------------------|
| 1            | 159.4, C              |                              |                    |                  |
| 2            | 118.6, C              |                              |                    |                  |
| 3            | 139.6, CH             | 7.24, d (8.4)                | 8',1,4a            | H-4              |
| 4            | 108.2, CH             | 6.51, d (8.4)                | 9a,2,4a,9          | H-3              |
| 4a           | 157.4, C              |                              |                    |                  |
| 5            | 70.2, CH              | 5.57, br s                   | 11,6,7,8a,10a,13,9 | H-6              |
| 6            | 27.9, CH              | 2.41, m                      | 11,8a,8            | H-5, H-11        |
| 7            | 33.5, CH <sub>2</sub> | 2.42–2.50 m                  | 6,5,8a,8           |                  |
| 8            | 178.7, C              |                              |                    |                  |
| 8a           | 101.1, C              |                              |                    |                  |
| 9            | 187.7, C              |                              |                    |                  |
| 9a           | 106.2, C              |                              |                    |                  |
| 10a          | 82.7, C               |                              |                    |                  |
| 11           | 17.6, CH <sub>3</sub> | 1.08, d (6.0)                | 6,7,5              | H-6              |
| 12 $\alpha$  | 65.7, CH <sub>2</sub> | 3.97, d (12.9)               | 5,10a              |                  |
| 12 $\beta$   |                       | 3.58, d (12.9)               |                    |                  |
| 13           | 170.6, C              |                              |                    |                  |
| 14           | 21.4, CH <sub>3</sub> | 2.11, s                      | 13                 |                  |
| 1-OH         |                       | 11.84, s                     | 9a,2,1             |                  |
| 2'           | 82.2, C               |                              |                    |                  |
| 3' $\alpha$  | 38.9, CH <sub>2</sub> | 3.37, d (17.3)               | 2',9',14',4'       |                  |
| 3' $\beta$   |                       | 2.76, d (17.4)               | 4a'4'              |                  |
| 4'           | 196.6, C              |                              |                    |                  |
| 4a'          | 107.2, C              |                              |                    |                  |
| 5'           | 161.5, C              |                              |                    |                  |
| 6'           | 110.3, CH             | 6.61, d (8.6)                | 4a',8',5'          |                  |
| 7'           | 140.3, CH             | 7.31, d (8.6)                | 2,8a',5'           |                  |
| 8'           | 116.0, C              |                              |                    |                  |
| 8a'          | 155.3, C              |                              |                    |                  |
| 9'           | 87.3, CH              | 4.10, d (2.7)                | 10',13',12',2'     | H-10'            |
| 10'          | 29.3, CH              | 2.62, m                      |                    | H-11',H-9',H-13' |
| 11' $\alpha$ | 35.9, CH <sub>2</sub> | 2.18, dd (17.8, 9.2)         | 12',10'            | H-10'            |
| 11' $\beta$  |                       | 1.85, dd (17.8, 9.2)         |                    |                  |
| 12'          | 176.0, C              |                              |                    |                  |
| 13'          | 21.0, CH <sub>3</sub> | 1.12, d (7.1)                | 10',11',9'         | H-10'            |
| 14' $\alpha$ | 63.2, CH <sub>2</sub> | 4.45, d (12.2)               | 3'2',9',15'        |                  |
| 14' $\beta$  |                       | 4.32, d (12.3)               |                    |                  |
| 15'          | 169.9, C              |                              |                    |                  |
| 16'          | 20.6, CH <sub>3</sub> | 2.03, s                      | 15'                |                  |
| 5'-OH        |                       | 11.63, s                     | 6',4a',5'          |                  |

Table S2. NMR data for compounds 2.

| Position     | $\delta_C$ , Type     | $\delta_H$ , Mult. (J in Hz) | HMBC(H→C)              | COSY             |
|--------------|-----------------------|------------------------------|------------------------|------------------|
| 1            | 159.6, C              |                              |                        |                  |
| 2            | 117.7, C              |                              |                        |                  |
| 3            | 140.2, CH             | 7.41, d (8.5)                | 6',4a,1                | H-4              |
| 4            | 108.0, CH             | 6.51, d (8.5)                | 9a,2,4a,9              | H-3              |
| 4a           | 157.3, C              |                              |                        |                  |
| 5            | 70.3, CH              | 5.75, br s                   | 11,6,7,8a, 12,10a,13,9 | H-6              |
| 6            | 27.8, CH              | 2.40, m                      | 11,7                   | H-5,H-11         |
| 7            | 33.5, CH <sub>2</sub> | 2.41–2.48, m                 | 6,5,8a,8               |                  |
| 8            | 178.1, C              |                              |                        |                  |
| 8a           | 101.0, C              |                              |                        |                  |
| 9            | 187.8, C              |                              |                        |                  |
| 9a           | 106.5, C              |                              |                        |                  |
| 10a          | 82.6, C               |                              |                        |                  |
| 11           | 17.7, CH <sub>3</sub> | 1.07, d (5.8)                | 6,7,5,8                | H-6              |
| 12 $\alpha$  | 65.7, CH <sub>2</sub> | 4.09, d (13.0)               | 5,10a,8a               |                  |
| 12 $\beta$   |                       | 3.54, d (13.0)               | 5                      |                  |
| 13           | 170.7, C              |                              |                        |                  |
| 14           | 21.0, CH <sub>3</sub> | 2.10, s                      | 13                     |                  |
| 1-OH         |                       | 11.86, s                     | 9a,2,1                 |                  |
| 2'           | 81.8, C               |                              |                        |                  |
| 3' $\alpha$  | 38.8, CH <sub>2</sub> | 3.34, d (17.4)               | 2',9',14',4'           |                  |
| 3' $\beta$   |                       | 2.81, d (17.4)               | 4a'4'14'               |                  |
| 4'           | 196.1, C              |                              |                        |                  |
| 4a'          | 107.2, C              |                              |                        |                  |
| 5'           | 159.1, C              |                              |                        |                  |
| 6'           | 117.9, C              |                              |                        |                  |
| 7'           | 140.8, CH             | 7.45, d (8.5)                | 2,8a',5'               | H-8'             |
| 8'           | 107.1, CH             | 6.45,d (8.5)                 | 4a',6',8a'             | H-7'             |
| 8a'          | 157.9, C              |                              |                        |                  |
| 9'           | 86.5, CH              | 4.23, d (3.7)                | 13',12'                | H-10'            |
| 10'          | 29.5, CH              | 2.92, m                      |                        | H-11',H-9',H-13' |
| 11' $\alpha$ | 36.6, CH <sub>2</sub> | 2.94, m                      | 12',10',13'            | H-10'            |
| 11' $\beta$  |                       | 2.24, m                      | 13',10',9',12'         |                  |
| 12'          | 175.5, C              |                              |                        |                  |
| 13'          | 20.6, CH <sub>3</sub> | 1.28, d (6.7)                | 10',11',9'             | H-10'            |
| 14' $\alpha$ | 63.8 CH <sub>2</sub>  | 4.39, d (12.1)               | 3'2',9',15'            |                  |
| 14' $\beta$  |                       | 4.31, d (12.1)               |                        |                  |
| 15'          | 170.0, C              |                              |                        |                  |
| 16'          | 20.9, CH <sub>3</sub> | 2.03, s                      | 15'                    |                  |
| 5'-OH        |                       | 11.98,s                      | 6',4a',5'              |                  |

**Table S3.** NMR data for compounds **3**.

| Position                  | $\delta_C$ , Type     | $\delta_H$ , Mult. ( <i>J</i> in Hz) | HMBC(H→C)            | COSY         |
|---------------------------|-----------------------|--------------------------------------|----------------------|--------------|
| 1,1'                      | 161.8, C              |                                      |                      |              |
| 2,2'                      | 110.2, CH             | 6.58, d (8.6)                        | 1,4,9a,4a,9          | H-3          |
| 3,3'                      | 141.1, CH             | 7.12, d (8.6)                        | 1,4a,4               | H-2          |
| 4,4'                      | 115.4, C              |                                      |                      |              |
| 4a,4a'                    | 153.7, C              |                                      |                      |              |
| 5,5'                      | 69.7, CH              | 5.48, br s                           | 13,8a,10a, 7,11,6,12 | H-6          |
| 6,6'                      | 27.9, CH              | 2.27, m                              |                      | H-5,H-11,H-7 |
| 7,7'                      | 33.3, CH <sub>2</sub> | 2.37–2.41, m                         | 8,8a,5,6,11          | H-6          |
| 8,8'                      | 177.7, C              |                                      |                      |              |
| 8a,8a'                    | 101.5, C              |                                      |                      |              |
| 9,9'                      | 188.1, C              |                                      |                      |              |
| 9a,9a'                    | 107.1, C              |                                      |                      |              |
| 10a,10a'                  | 82.2, C               |                                      |                      |              |
| 11,11'                    | 17.6, CH <sub>3</sub> | 1.01, d (6.4)                        | 6,7,5                | H-6          |
| 12 $\alpha$ ,12' $\alpha$ | 64.6 CH <sub>2</sub>  | 3.87, d (13.0)                       | 5,10a                |              |
| 12 $\beta$ , 12' $\beta$  |                       | 3.42, d (13.0)                       | 10a                  |              |
| 13,13'                    | 169.9, C              |                                      |                      |              |
| 14,14'                    | 21.0, CH <sub>3</sub> | 2.14, s                              | 13                   |              |
| 1,1'-OH                   |                       | 11.44, s                             | 1,9a,2               |              |
| 8,8'-OH                   |                       | 13.97, s                             | 7,8a,8               |              |



Figure S1. Cont.

Dept 135

deingbo-d4yh5  
DEPT135

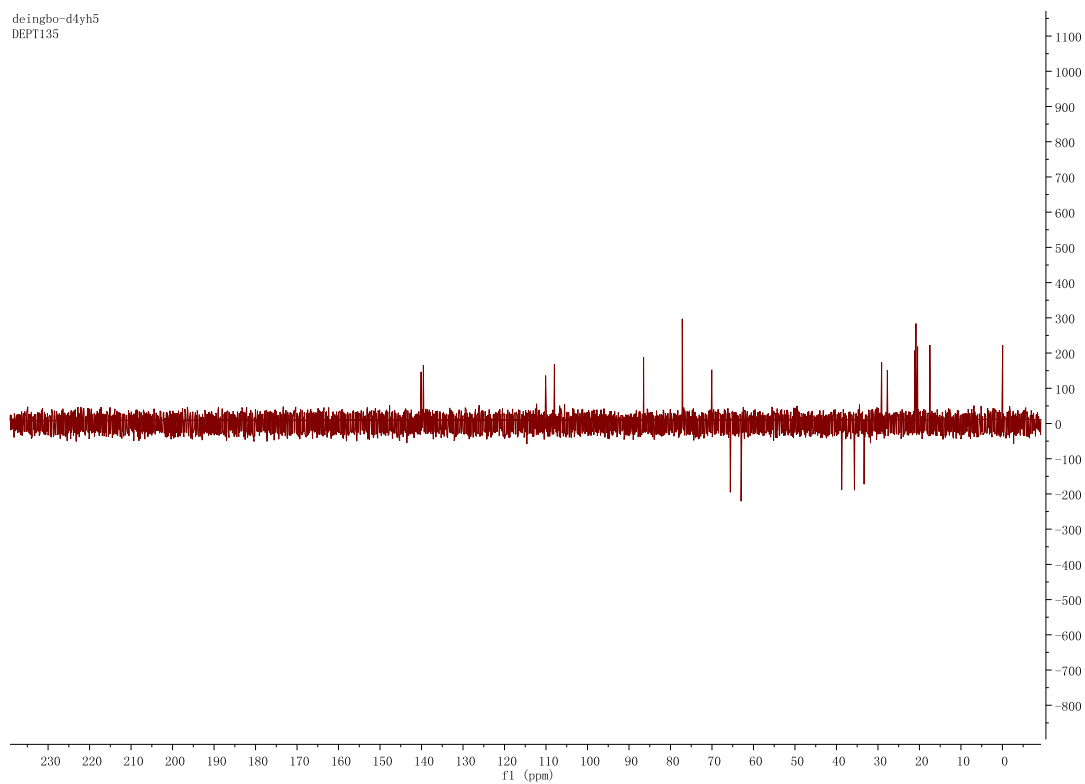

$^1\text{H}$ - $^1\text{H}$   
COSY

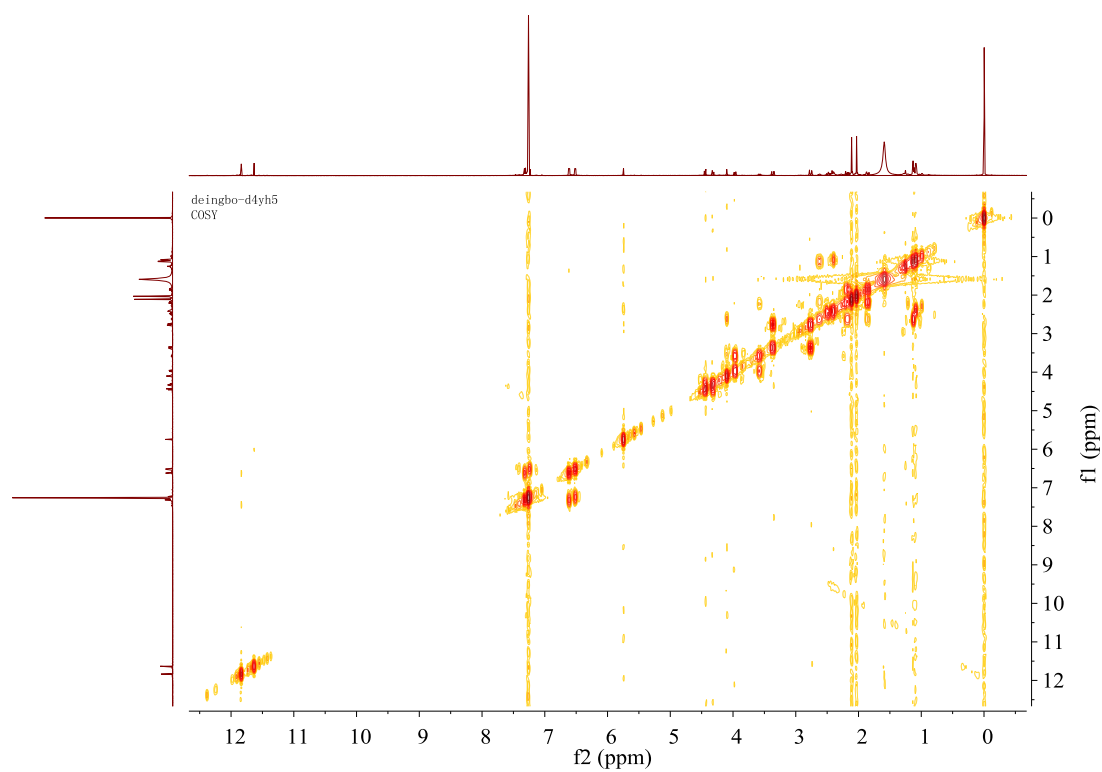

Figure S1. Cont.

HSQC

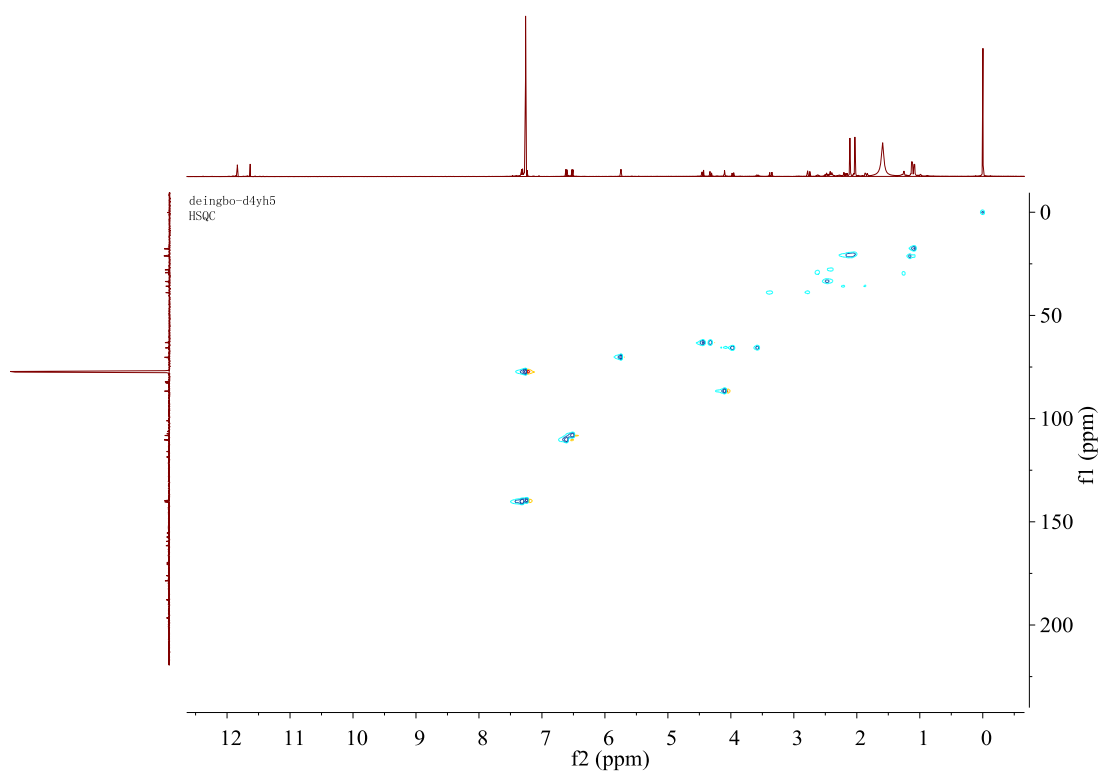

HMBC

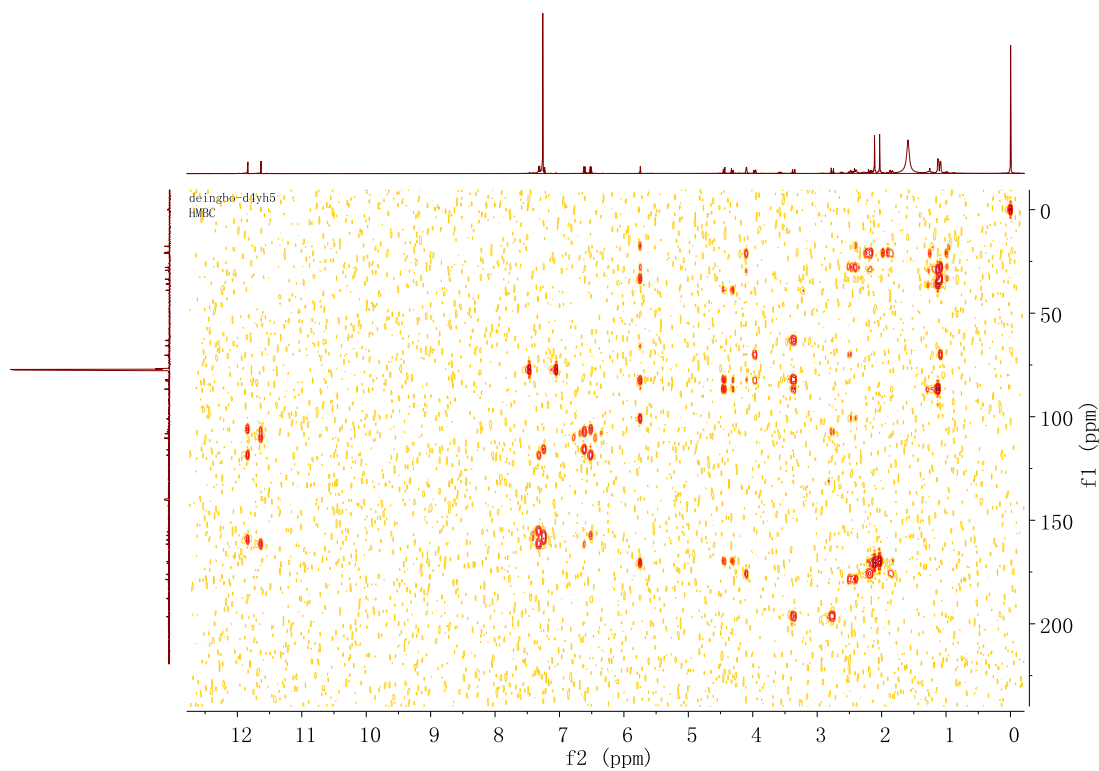

Figure S1. Cont.

NOE

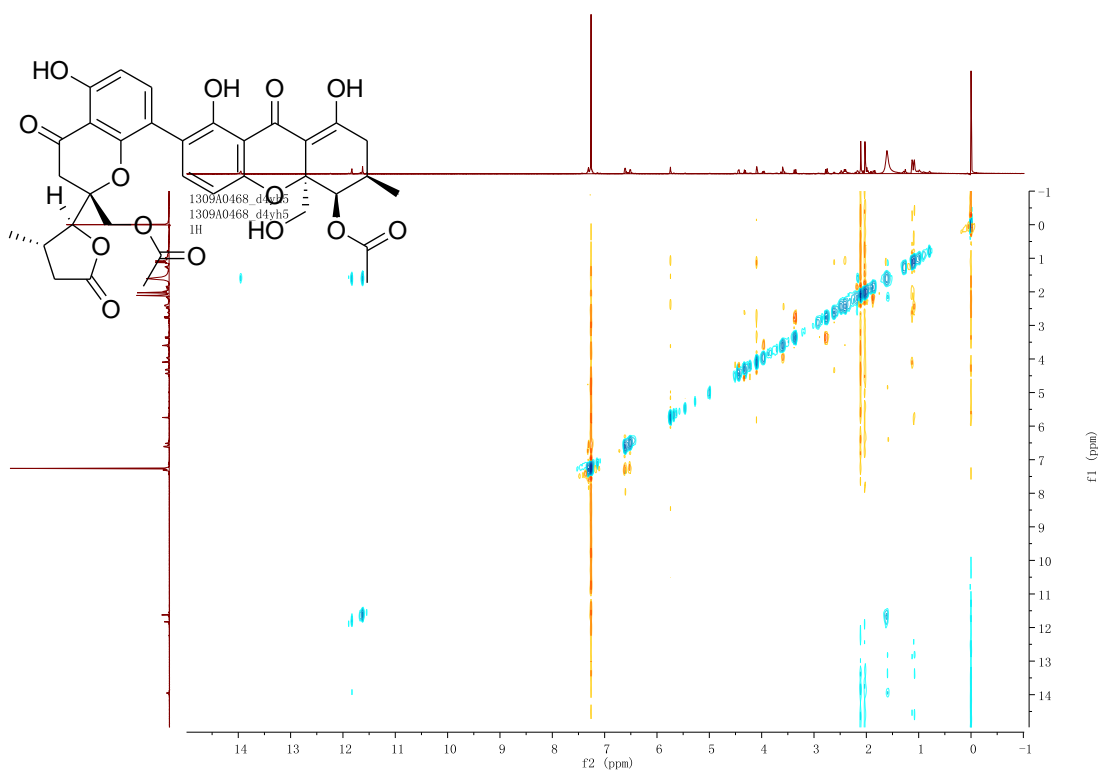



Figure S2. HRESIMS of compound 1.

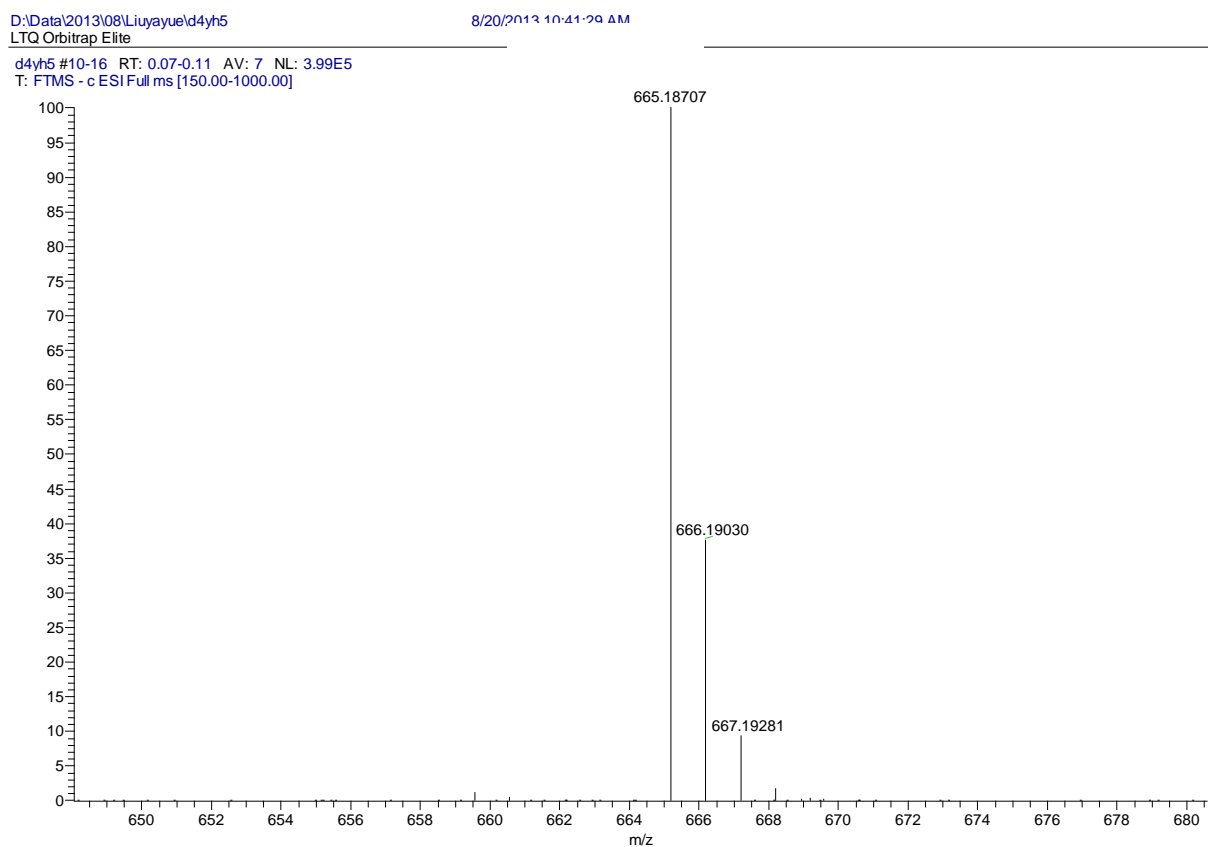**SPECTRUM—simulation**

| <i>m/z</i> | Theo. Mass | Delta (ppm) | RDB equiv. | Composition |
|------------|------------|-------------|------------|-------------|
| 665.18707  | 665.18758  | -0.76       | 18.5       | C34 H33 O14 |

**Limits:**

- (1) Charge: -1
- (2) Nitrogen-Rule: Do not use
- (3) Mass tolerance: 10.00 ppm
- (4) Elements in use:  $^{12}\text{C}$  (0-40),  $^1\text{H}$  (0-60),  $^{16}\text{O}$  (0-15)

Figure S3. IR of compound 1.

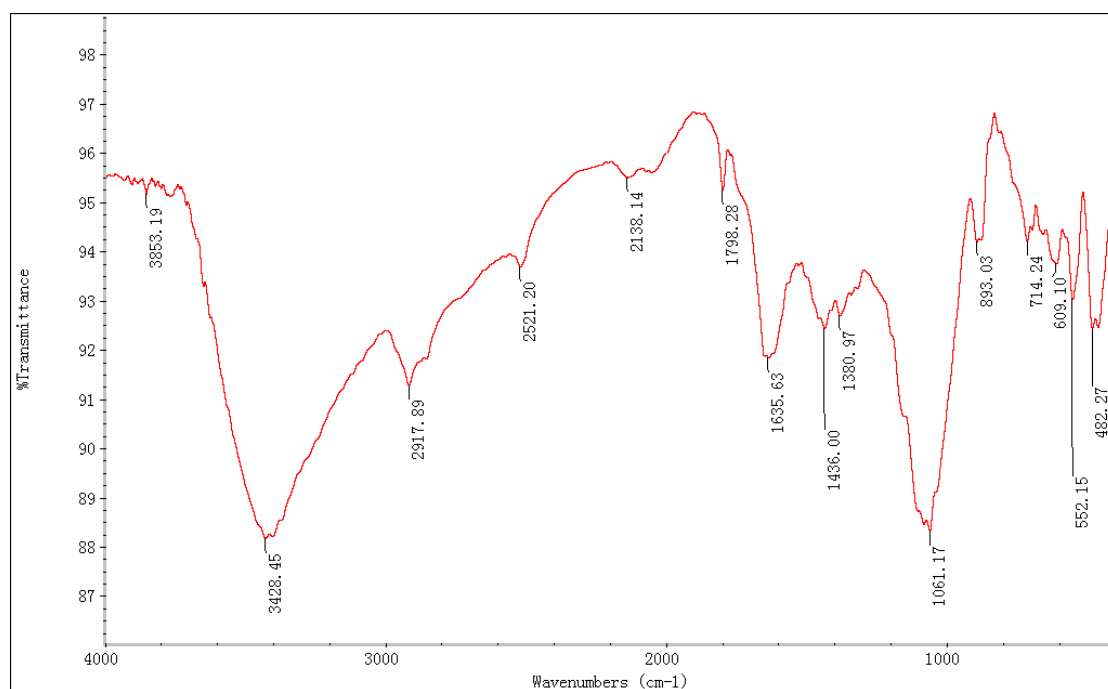

Figure S4. UV of compound 1.

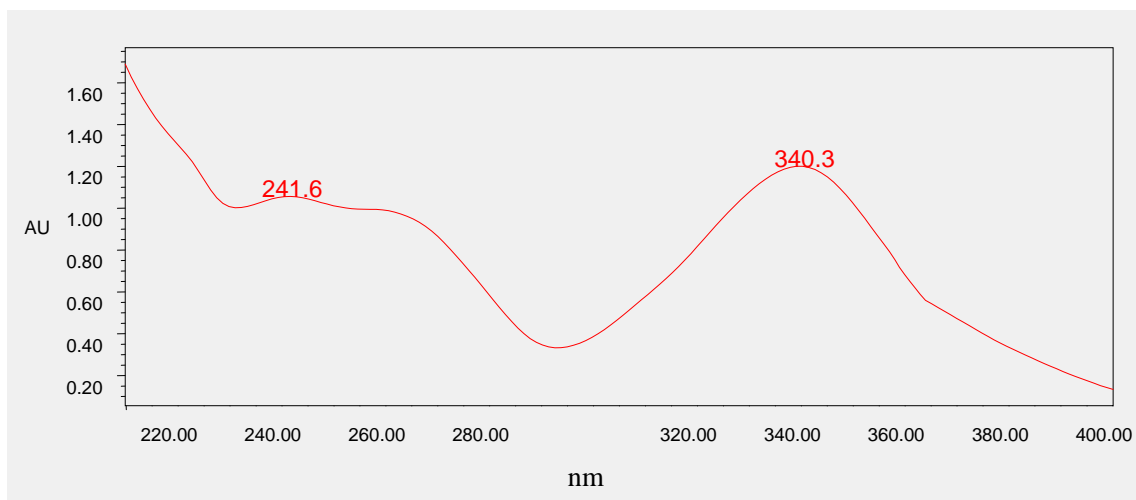

Figure S5.  $^1\text{H}$ ,  $^{13}\text{C}$ ,  $^1\text{H}$ - $^1\text{H}$  COSY, HSQC, HMBC, NOE of compound 2.

$^1\text{H}$  NMR

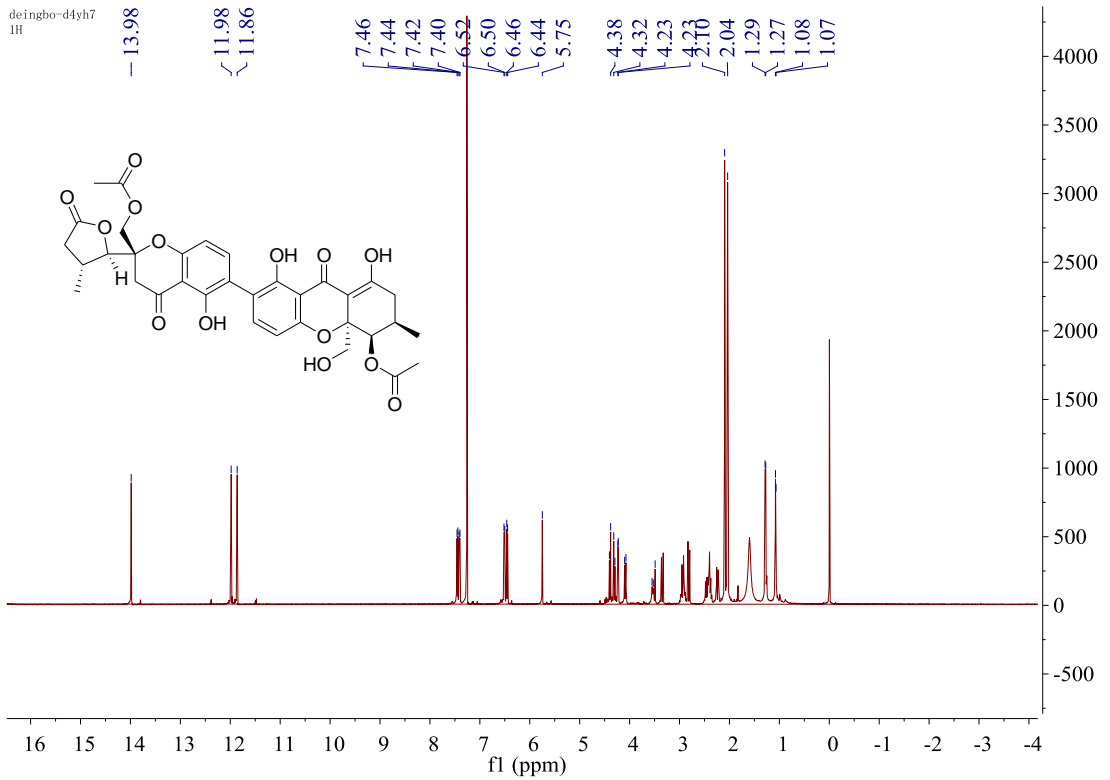

$^{13}\text{C}$  NMR

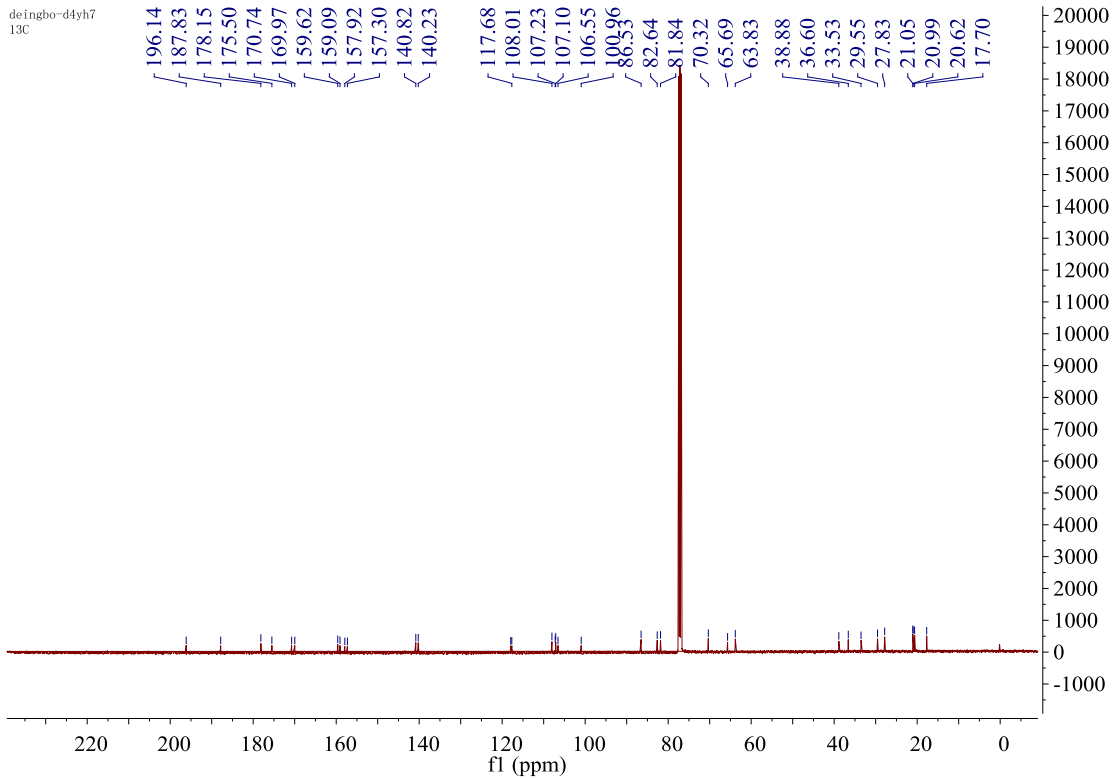

Figure S5. Cont.

$^1\text{H}$ - $^1\text{H}$   
COSY

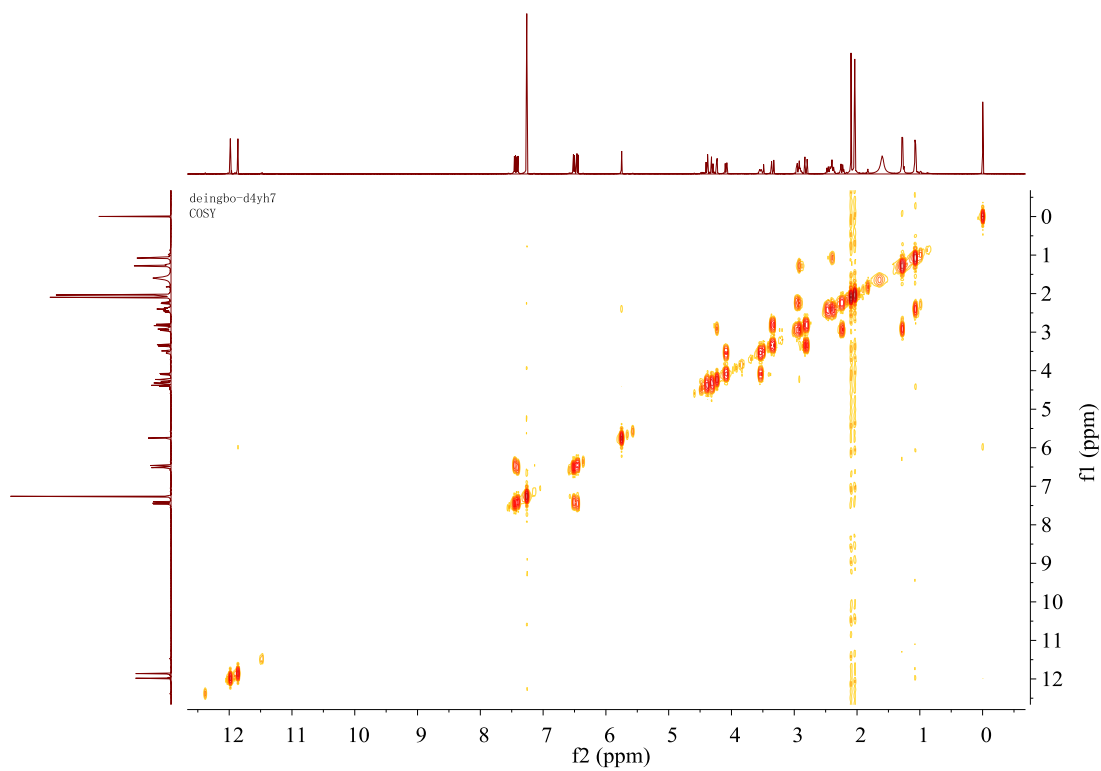

HSQC

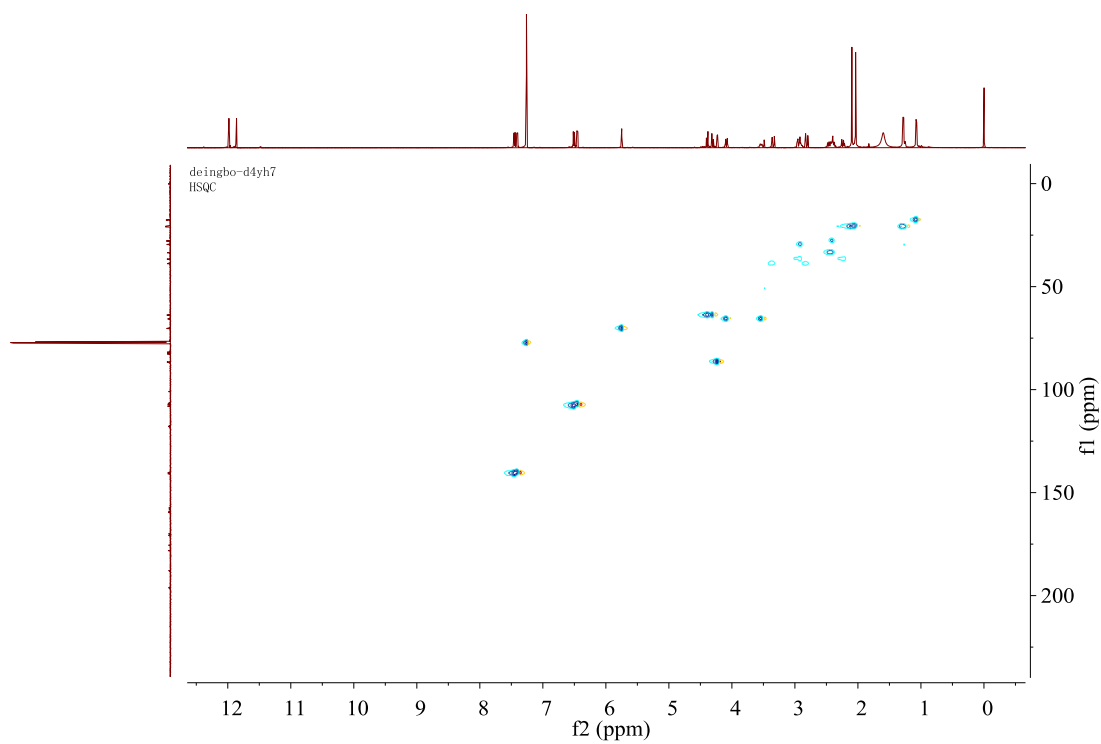

Figure S5. Cont.

HMBC

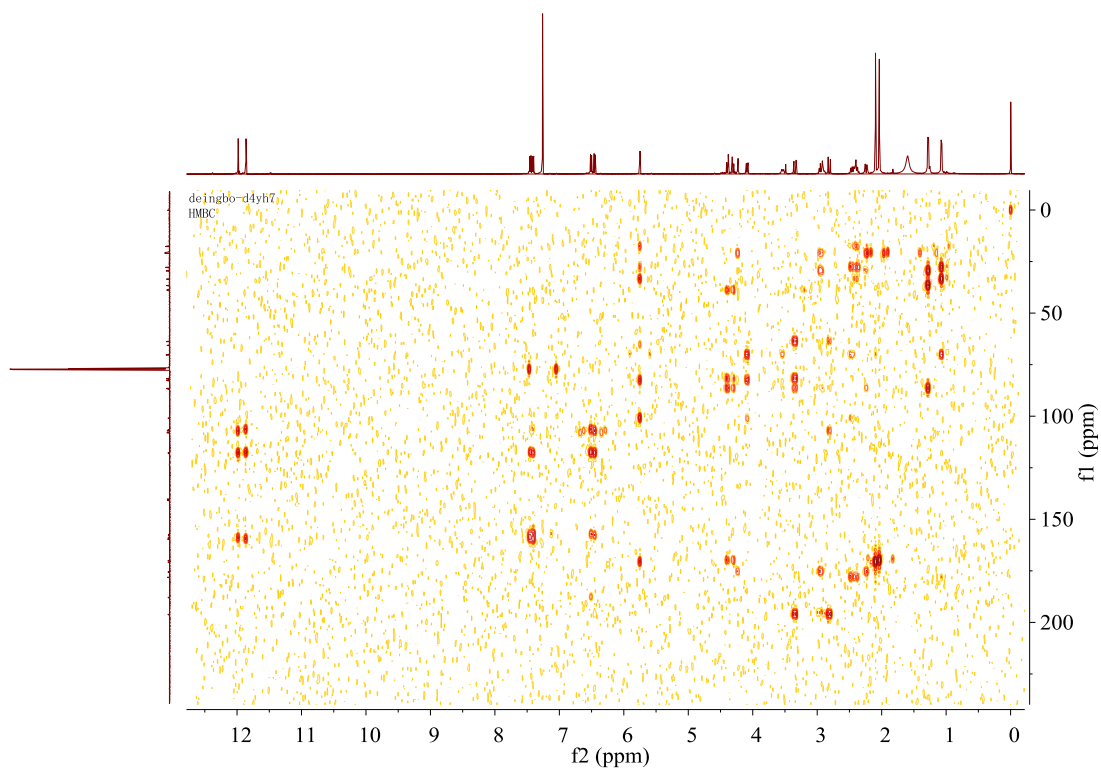

NOE

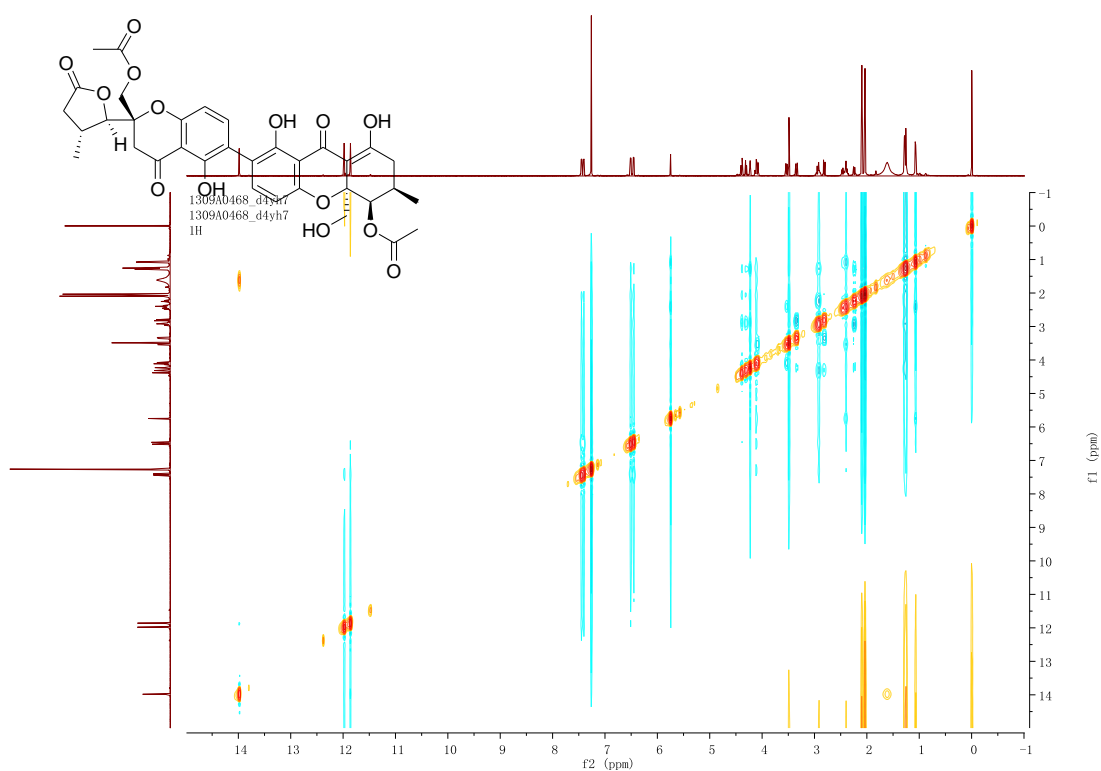

Figure S6. HRESIMS of compound 2.

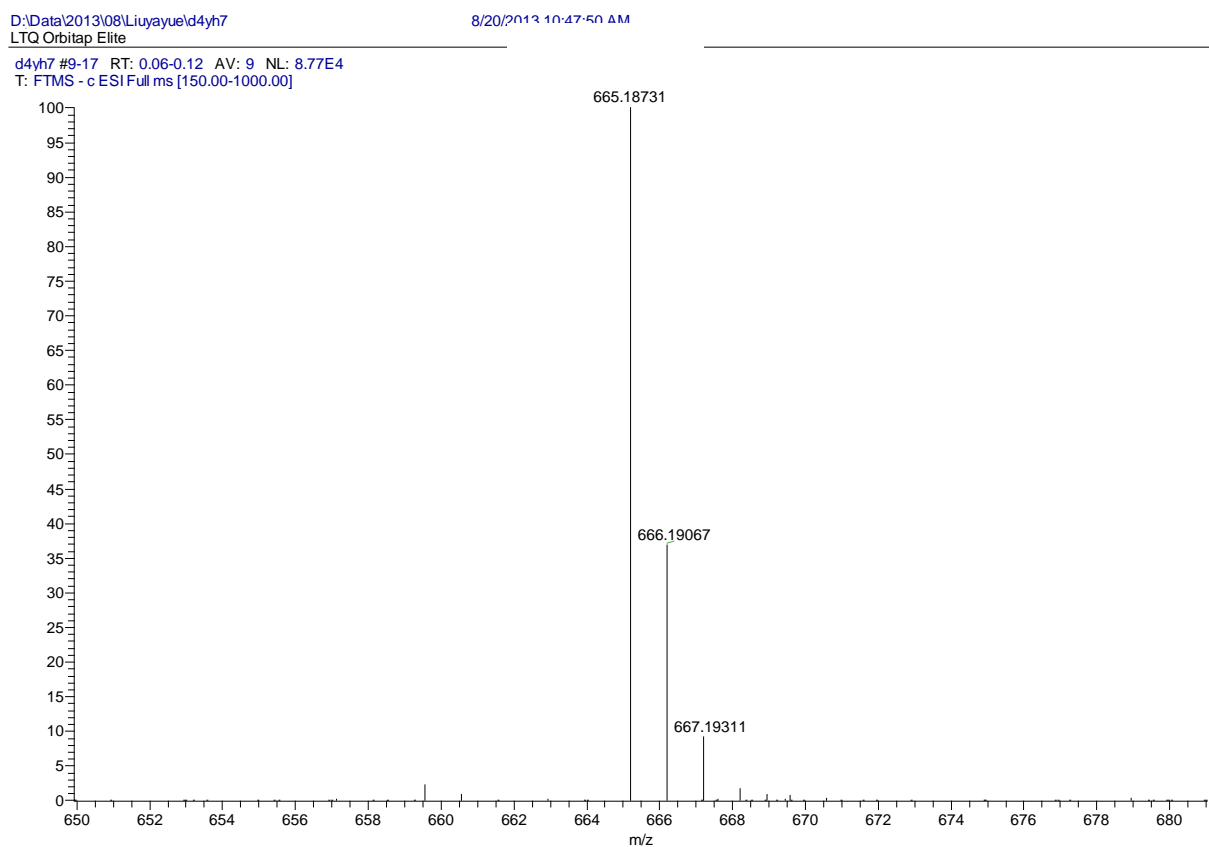**SPECTRUM—simulation**

| <i>m/z</i> | Theo. Mass | Delta (ppm) | RDB equiv. | Composition |
|------------|------------|-------------|------------|-------------|
| 665.18731  | 665.18758  | -0.40       | 18.5       | C34 H33 O14 |

**Limits:**

- (1) Charge: -1
- (2) Nitrogen-Rule: Do not use
- (3) Mass tolerance: 10.00 ppm
- (4) Elements in use:  $^{12}\text{C}$  (0-40),  $^1\text{H}$  (0-60),  $^{16}\text{O}$  (0-15)

**Figure S7. IR of compound 2.**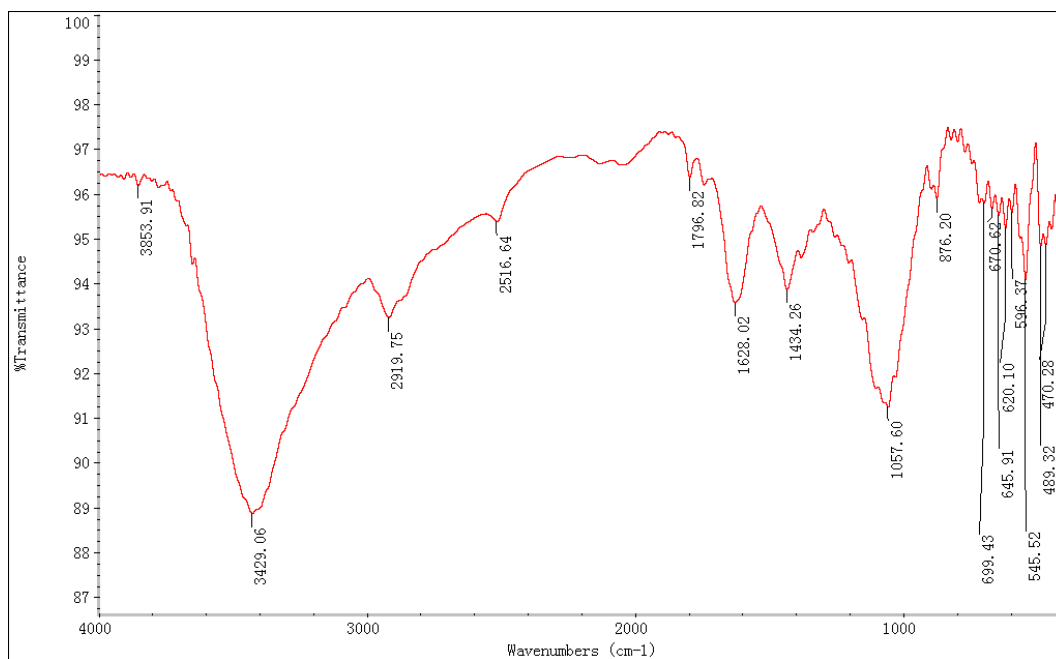**Figure S8. UV of compound 2.**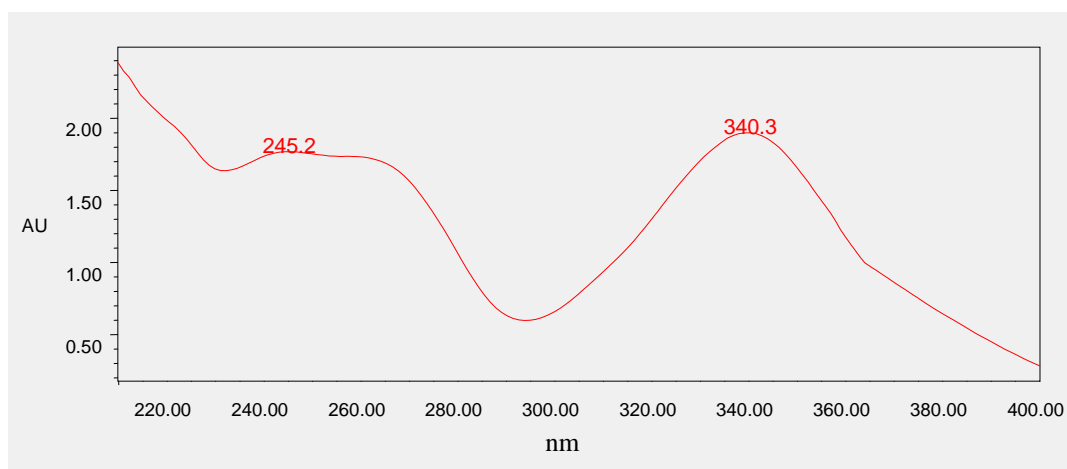

**Figure S9.**  $^1\text{H}$ ,  $^{13}\text{C}$ , Dept 135,  $^1\text{H}$ - $^1\text{H}$  COSY, HSQC, HMBC, NOE of compound **3**. $^1\text{H}$  NMR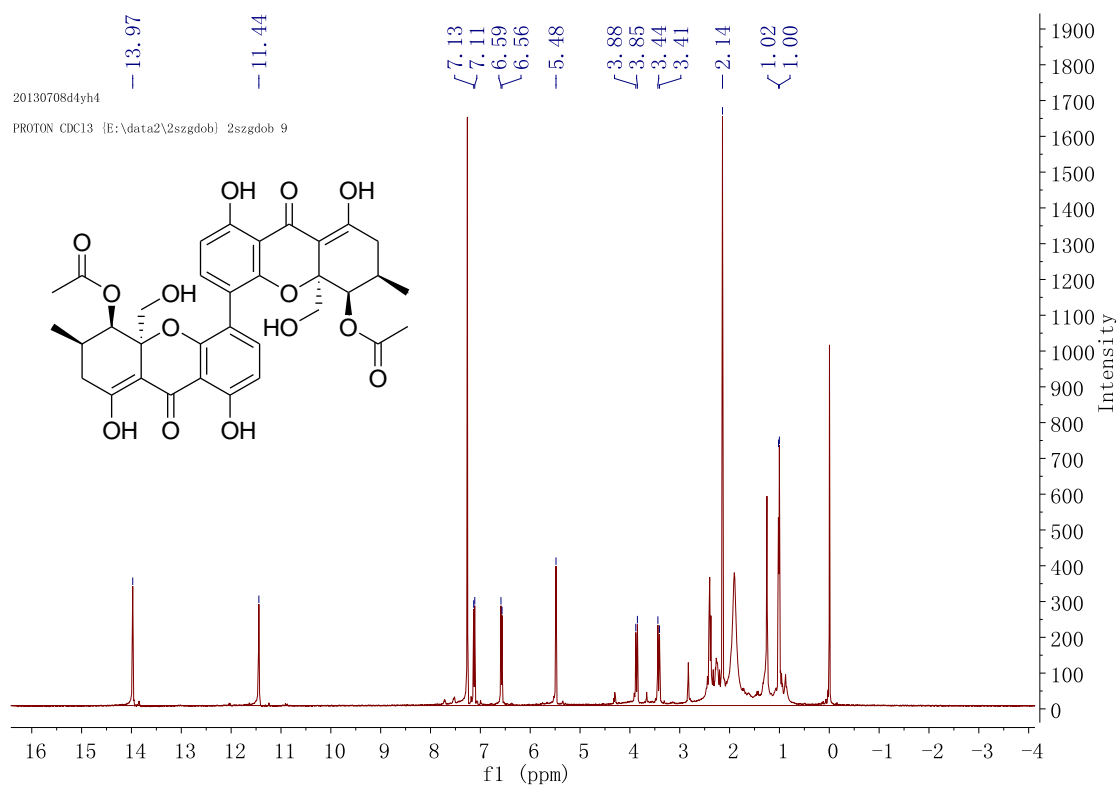 $^{13}\text{C}$  NMR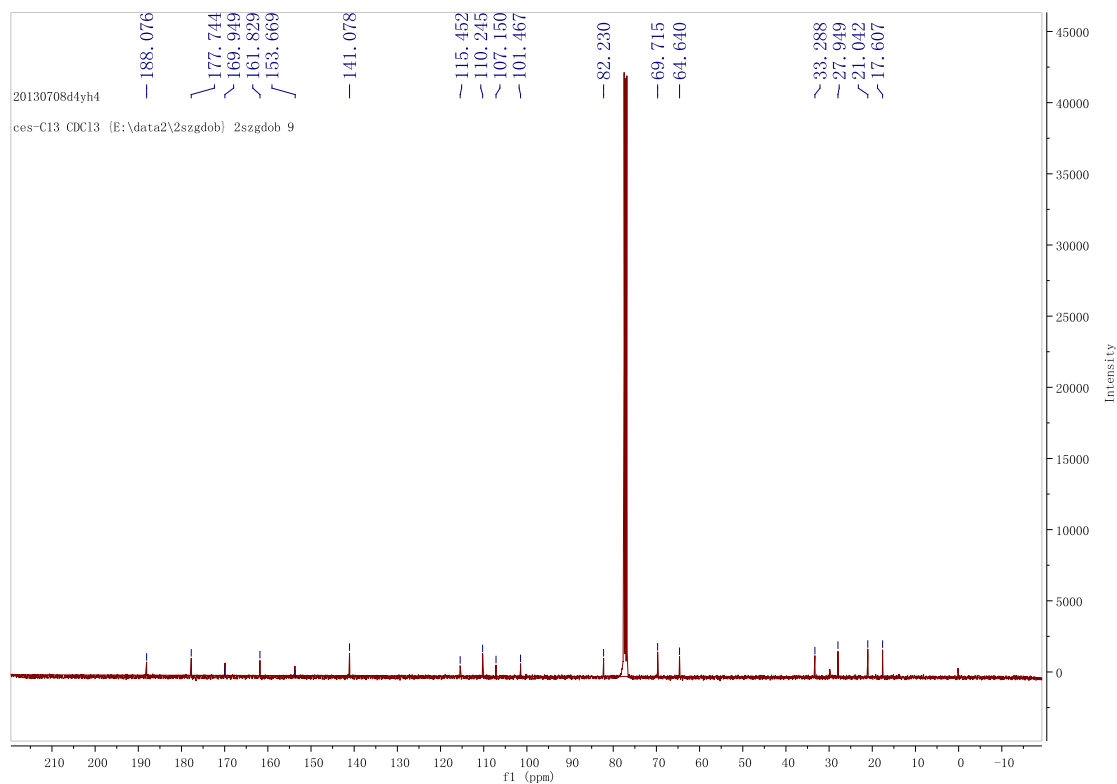



Figure S9. Cont.

Dept 135

20130716d4yh4  
ces-dept135 CDCl3 [E:\data2\2szgdob] 2szgdob 31

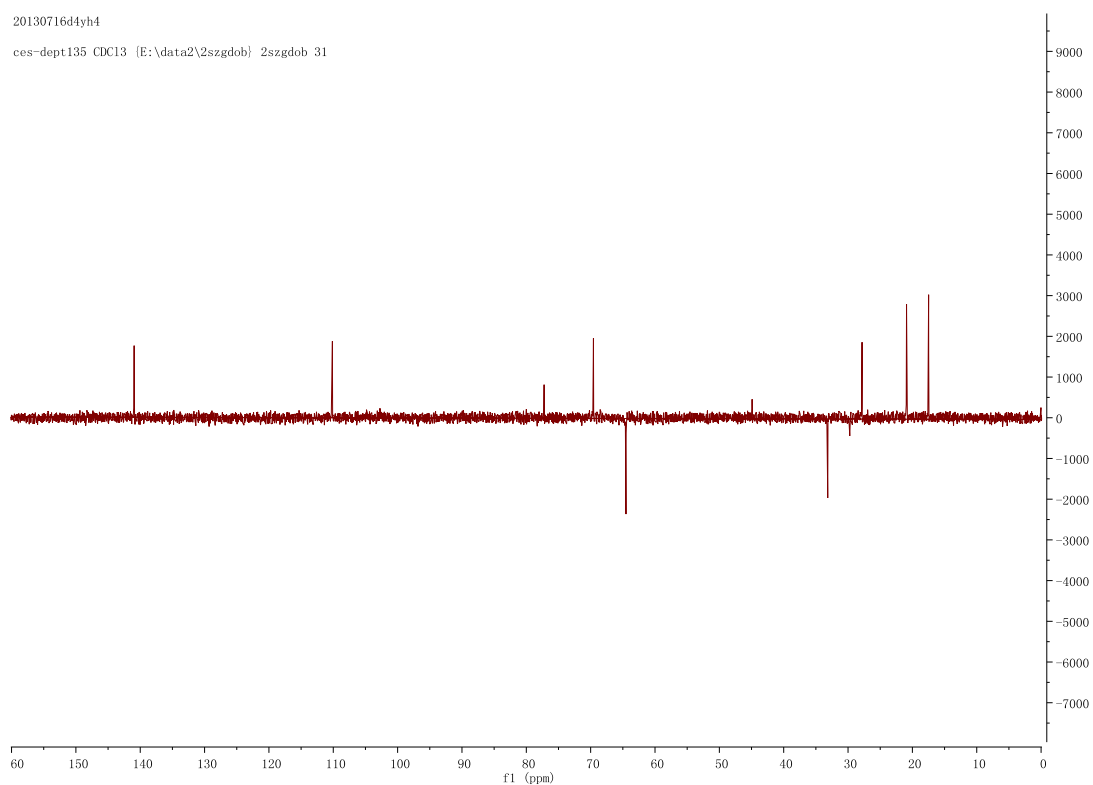

<sup>1</sup>H-<sup>1</sup>H  
COSY

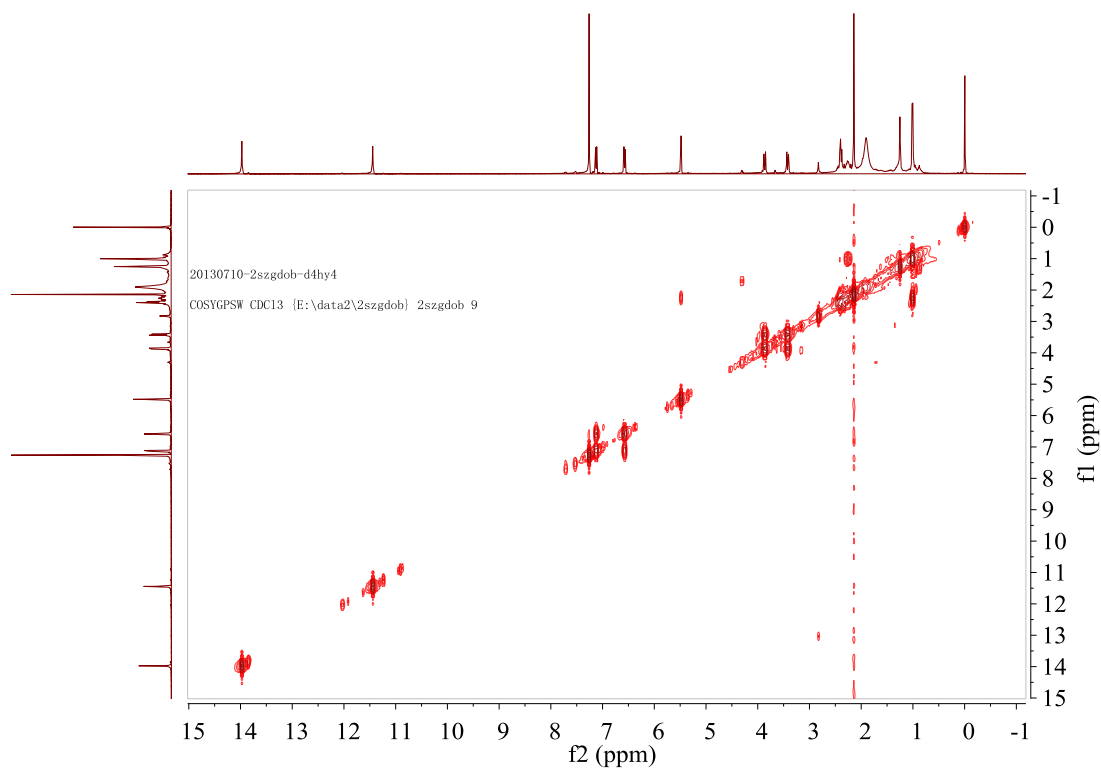

Figure S9. Cont.

HSQC

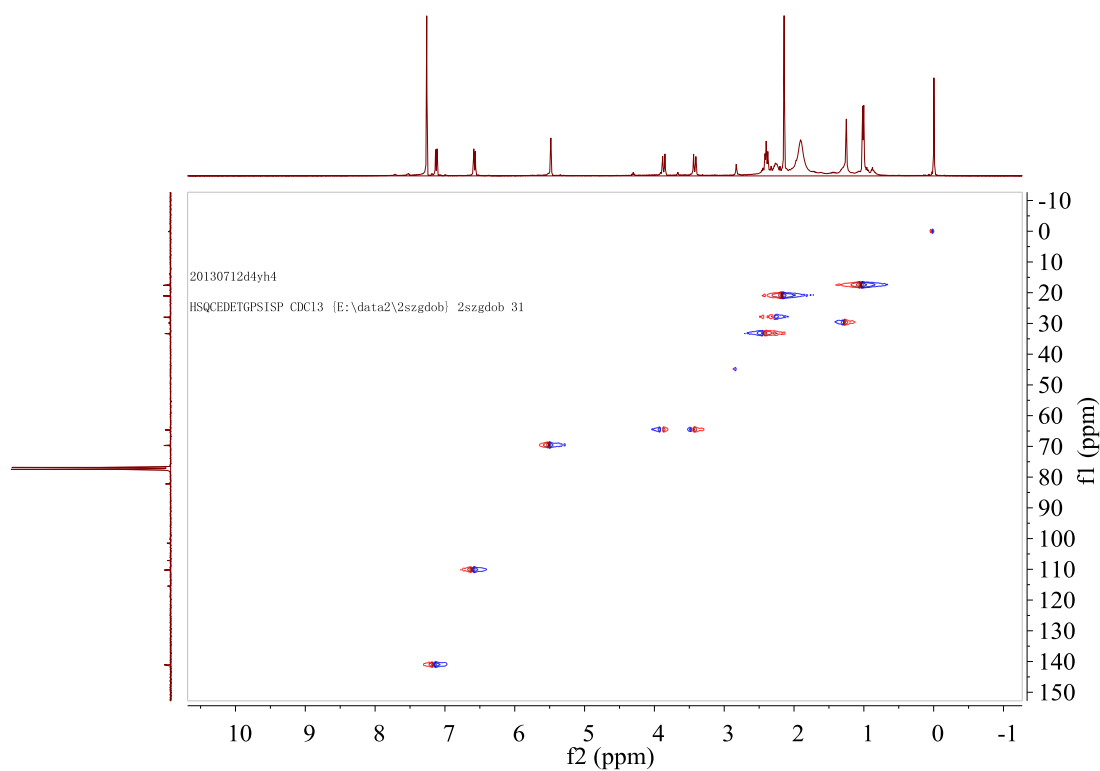

HMBC

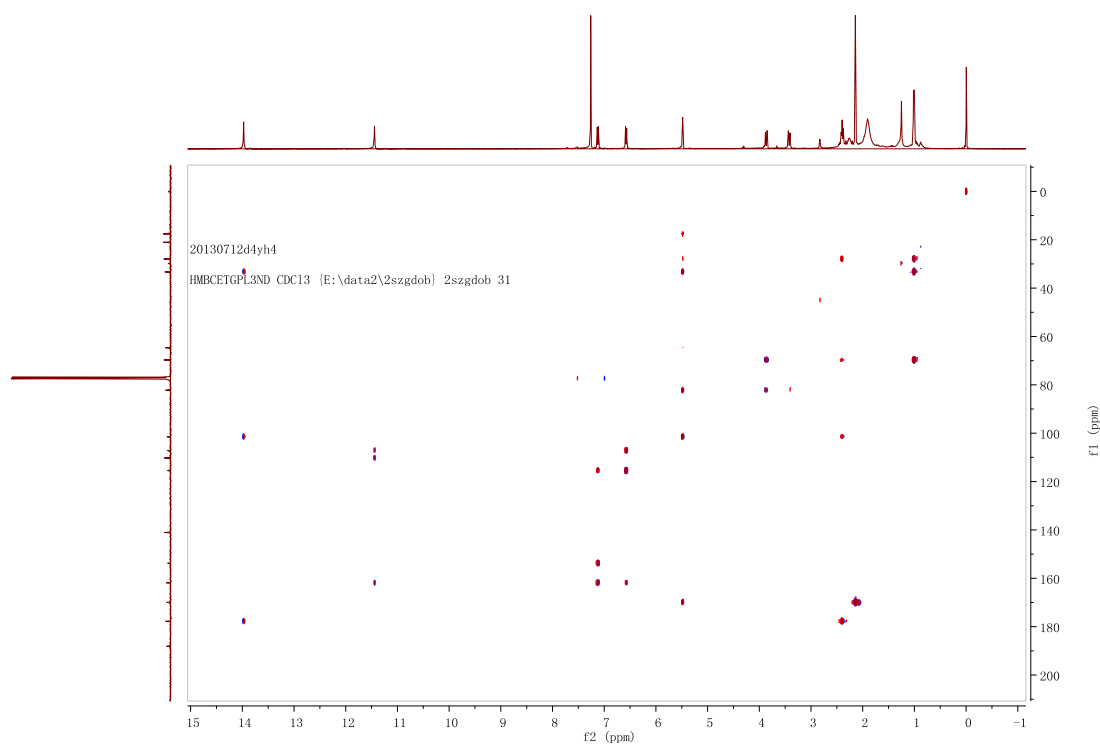

Figure S9. Cont.

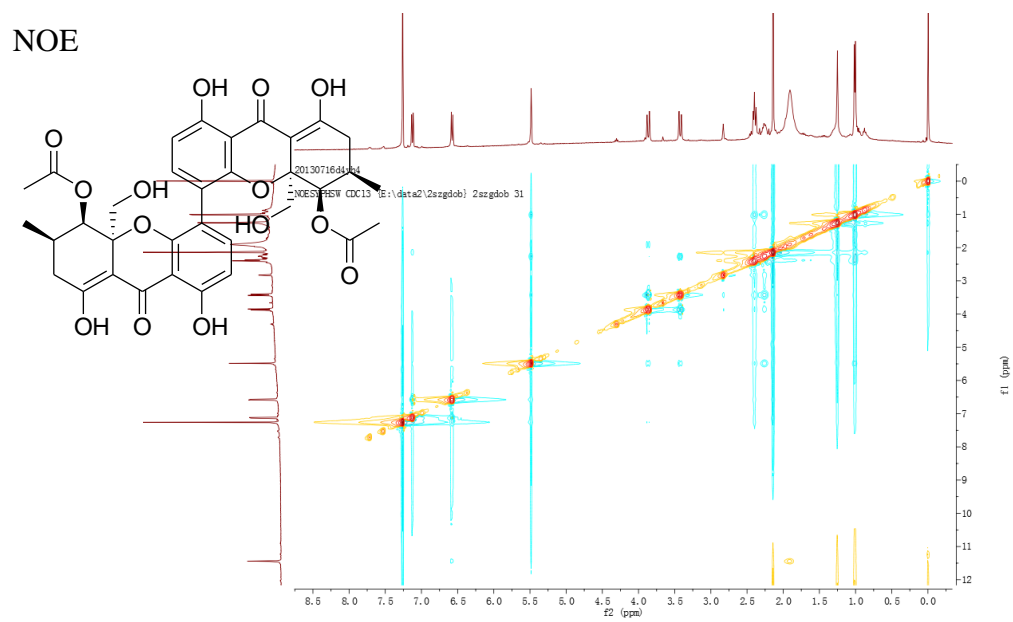

Figure S10. HRESIMS of compound 3.

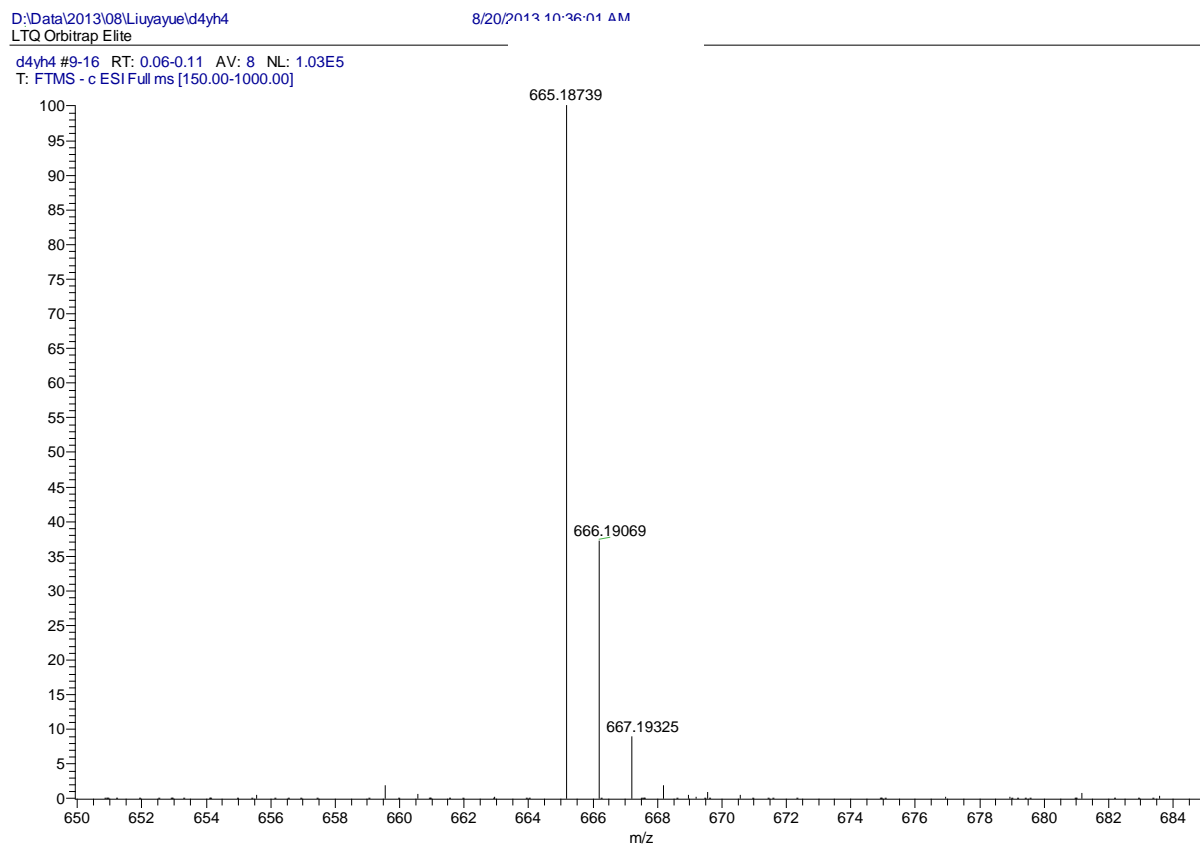**SPECTRUM—simulation**

| <i>m/z</i> | Theo. Mass | Delta (ppm) | RDB equiv. | Composition |
|------------|------------|-------------|------------|-------------|
| 665.18739  | 665.18758  | -0.28       | 18.5       | C34 H33 O14 |

**Limits:**

- (1) Charge: -1
- (2) Nitrogen-Rule: Do not use
- (3) Mass tolerance: 10.00 ppm
- (4) Elements in use: <sup>12</sup>C (0-40), <sup>1</sup>H (0-60), <sup>16</sup>O (0-15)

Figure S11. IR of compound 3.

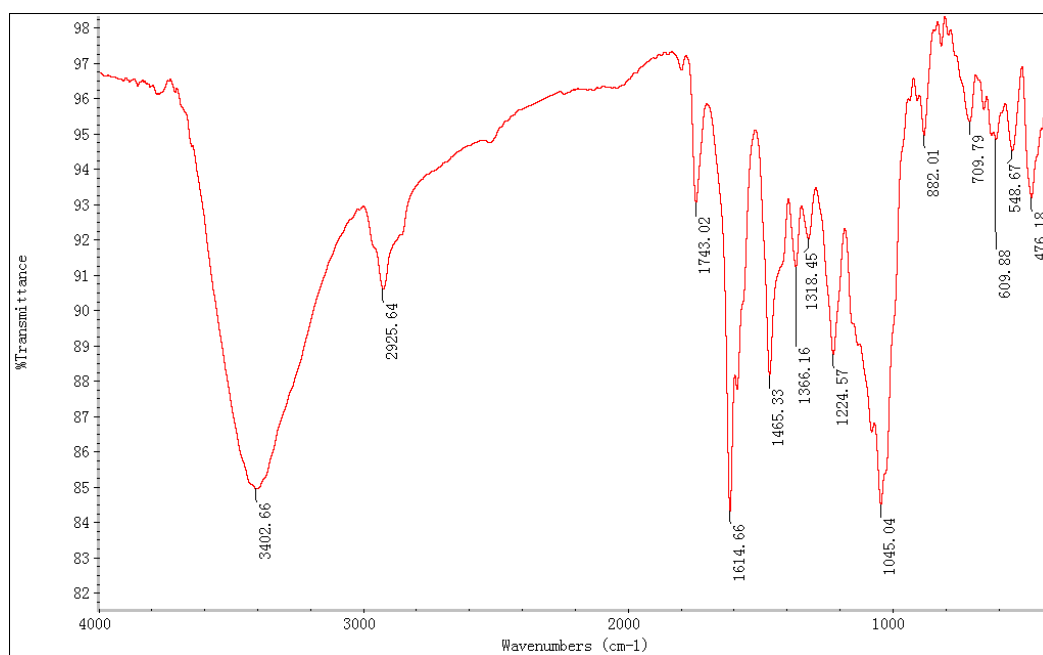

Figure S12. UV of compound 3.

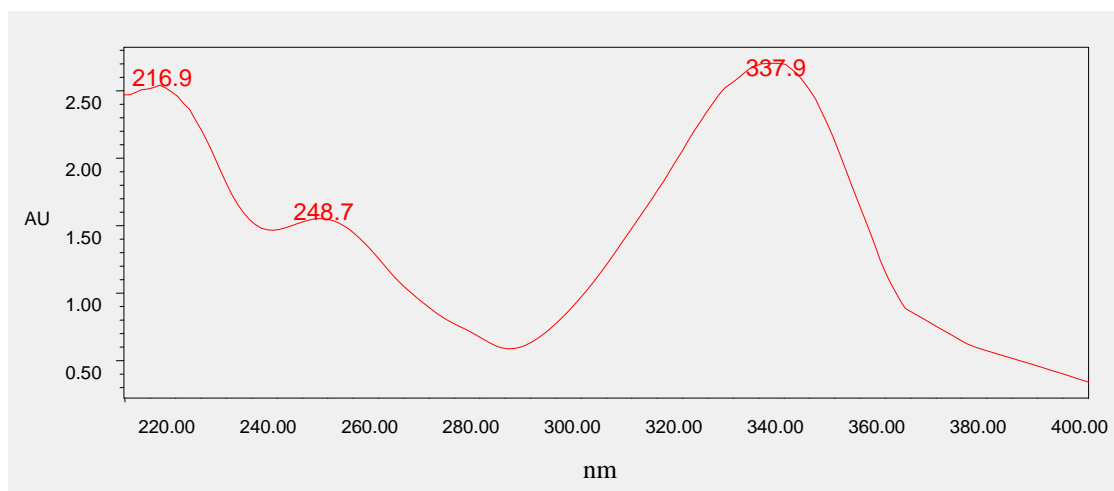

**Figure S13.**  $^1\text{H}$ ,  $^{13}\text{C}$ ,  $^1\text{H}$ - $^1\text{H}$  COSY, HSQC, HMBC, NOE of compound 4.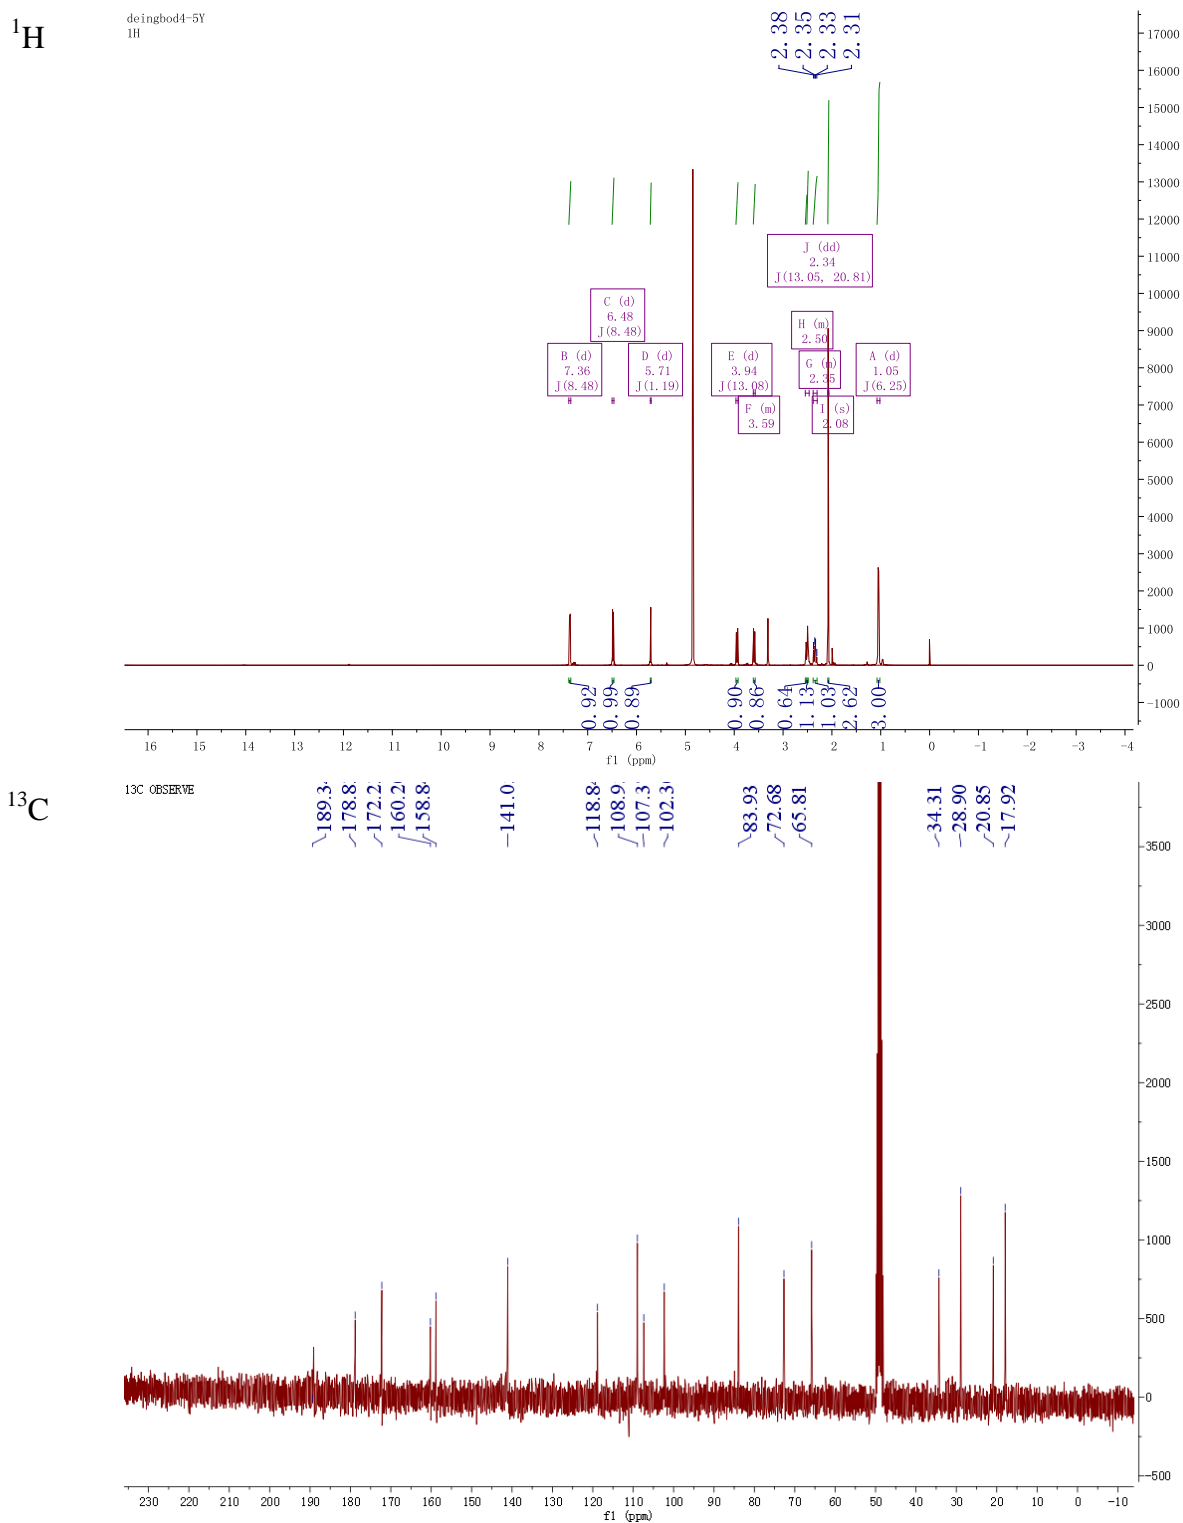

Figure S13. Cont.

$^1\text{H}$ - $^1\text{H}$   
COSY

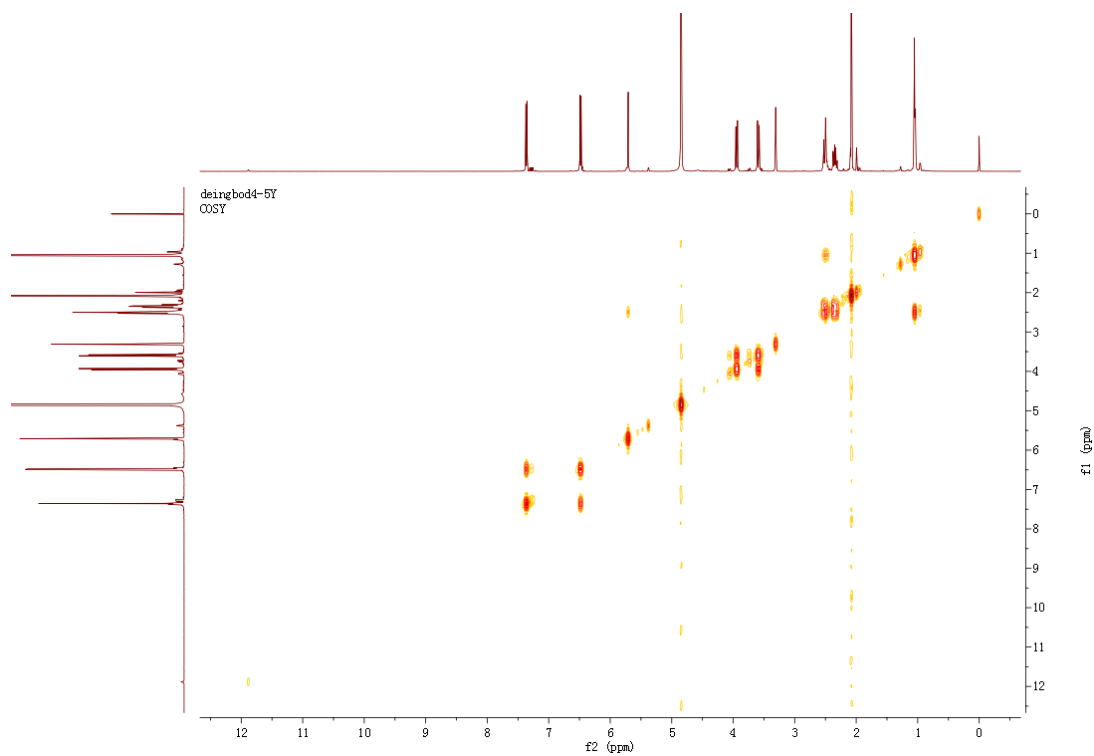

HSQC

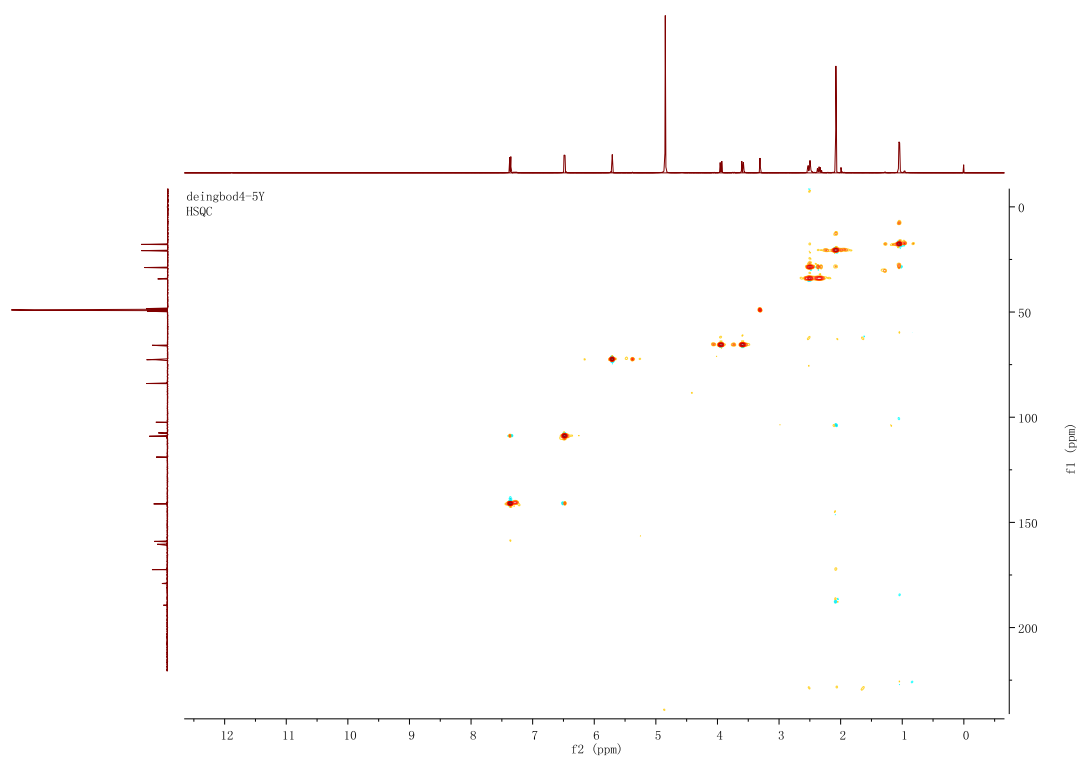

Figure S13. Cont.

HMBC

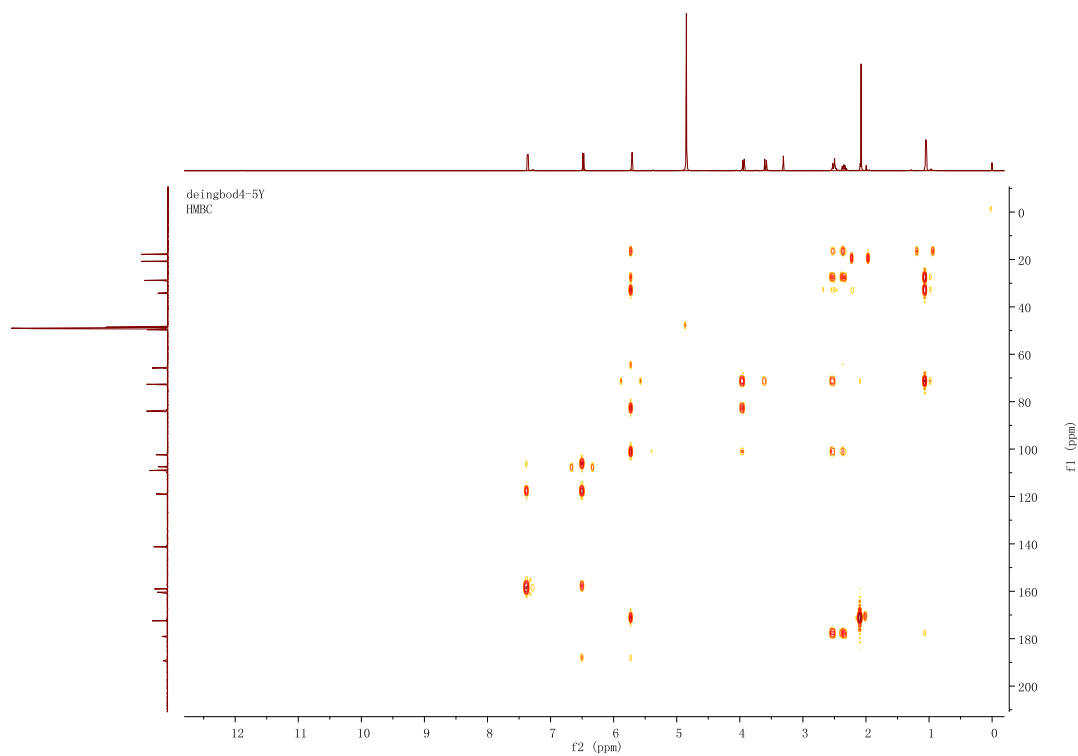

NOE

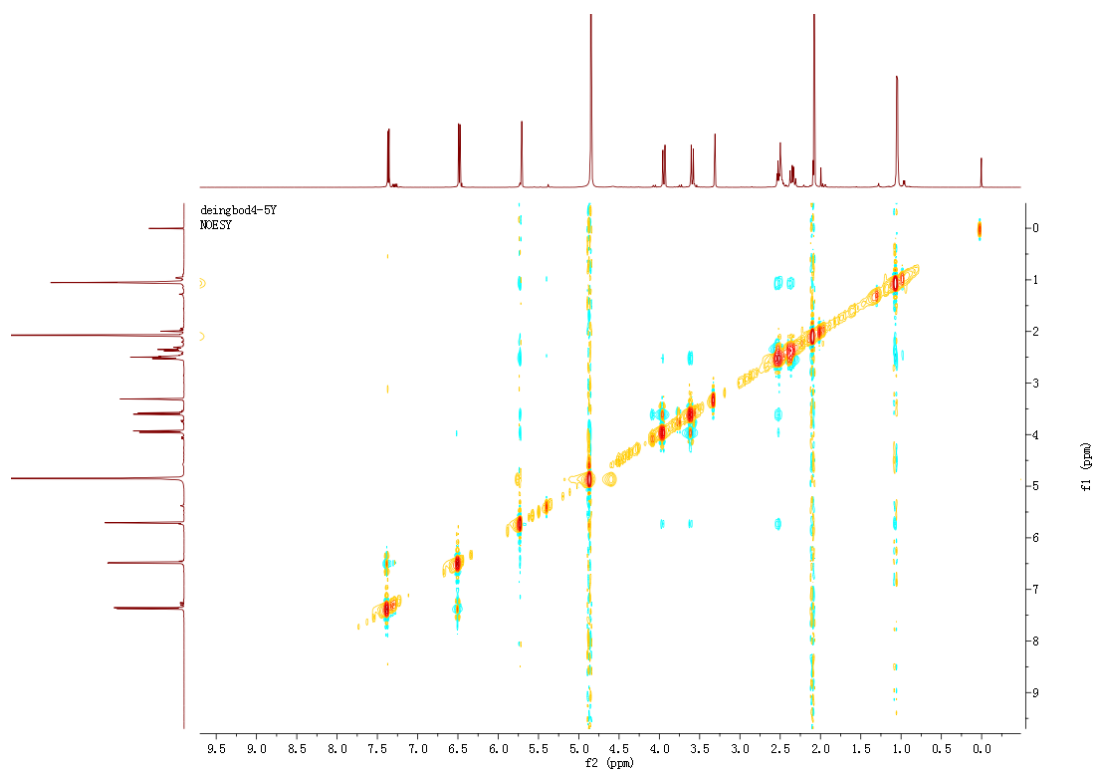



**Figure S14.**  $^1\text{H}$ ,  $^{13}\text{C}$ ,  $^1\text{H}$ - $^1\text{H}$  COSY, HSQC, HMBC, NOE of compound 5.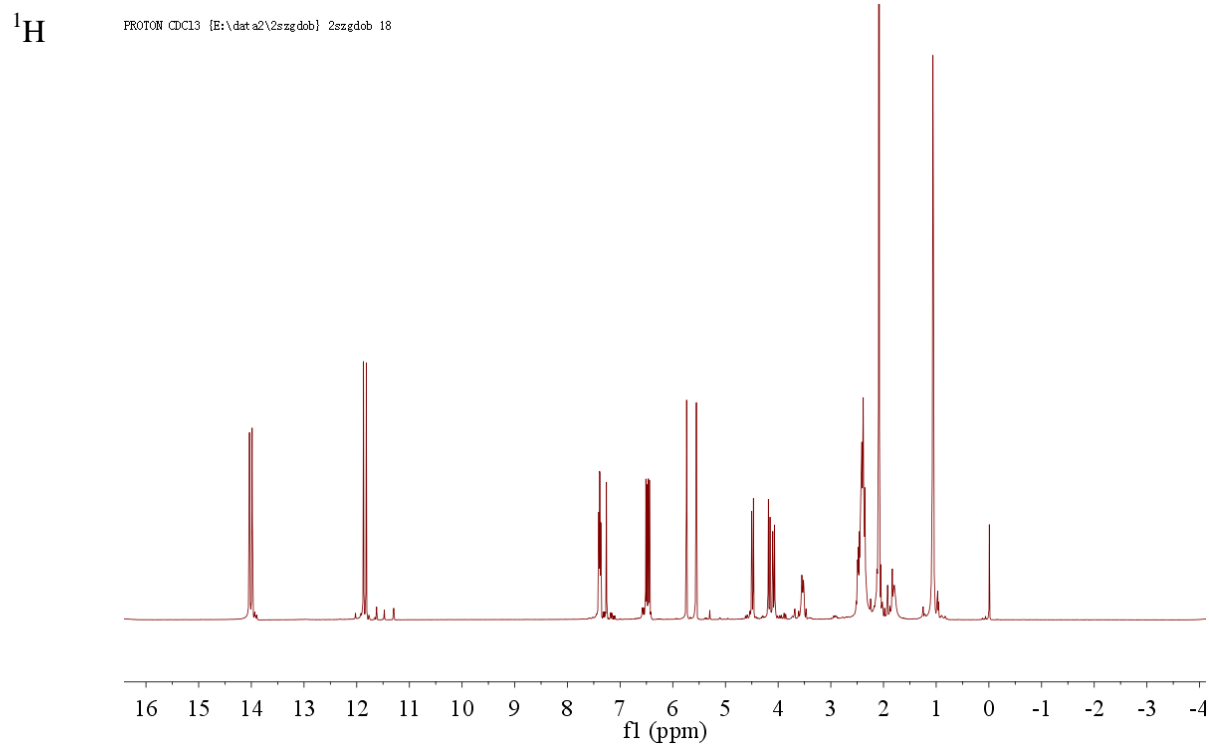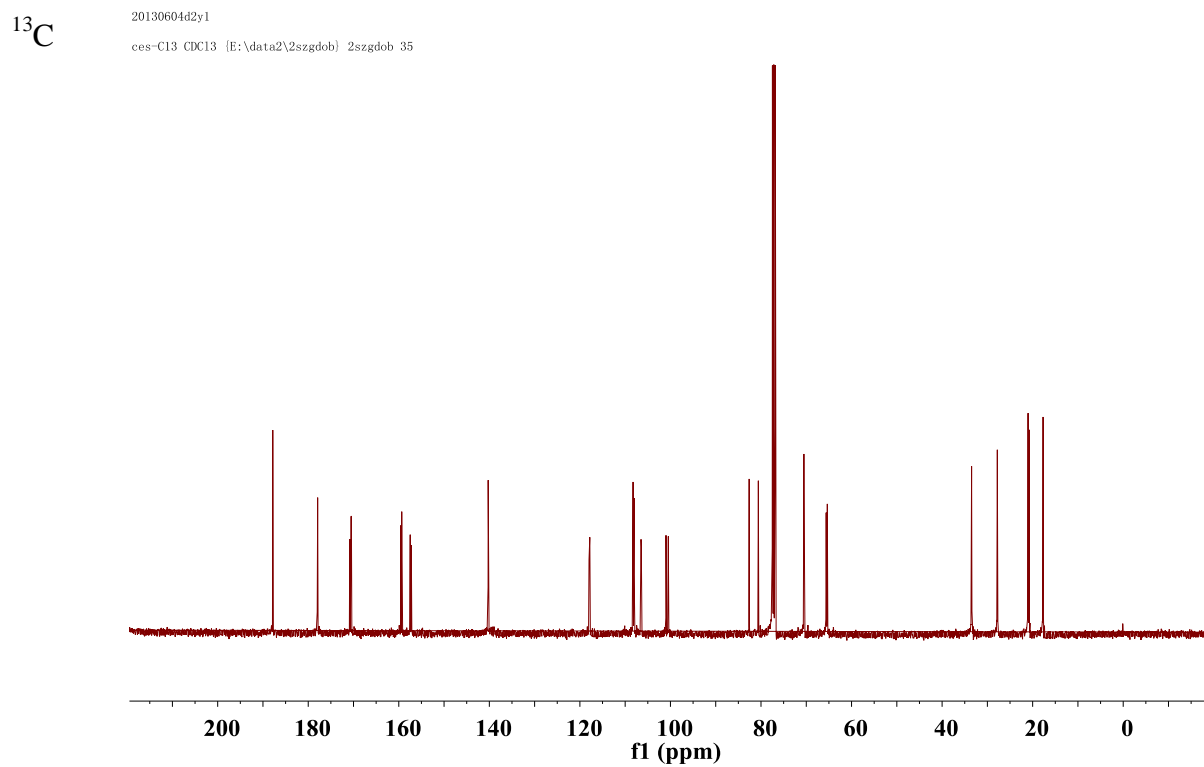



Figure S14. Cont.

HMBC

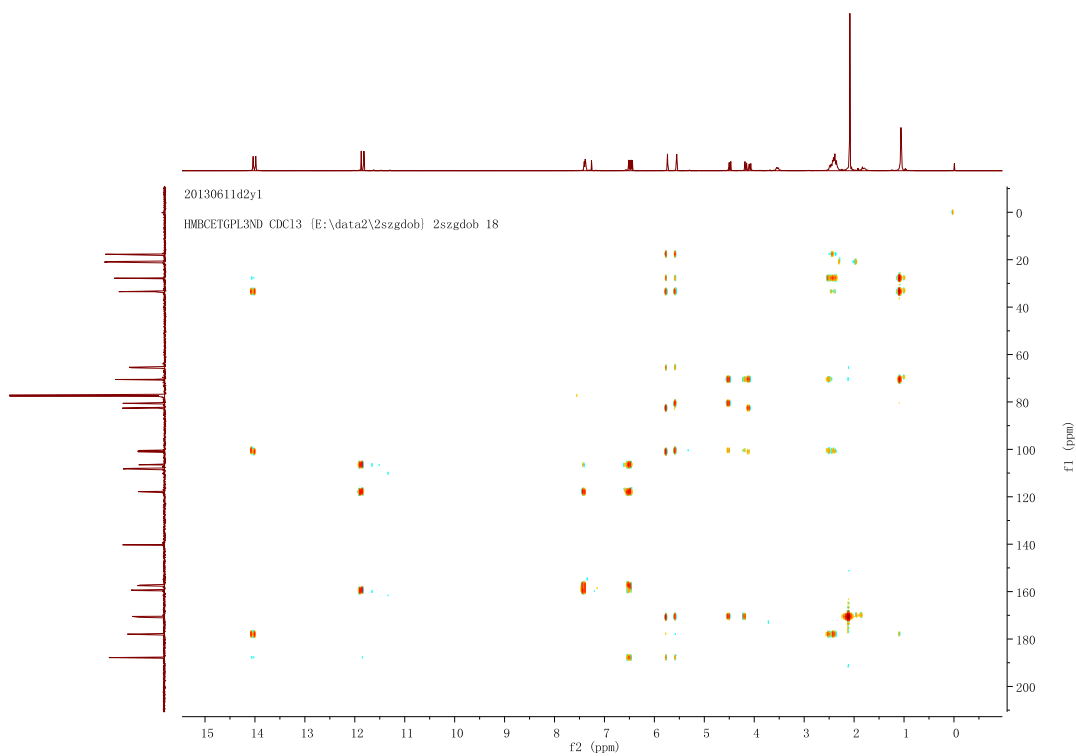

NOE

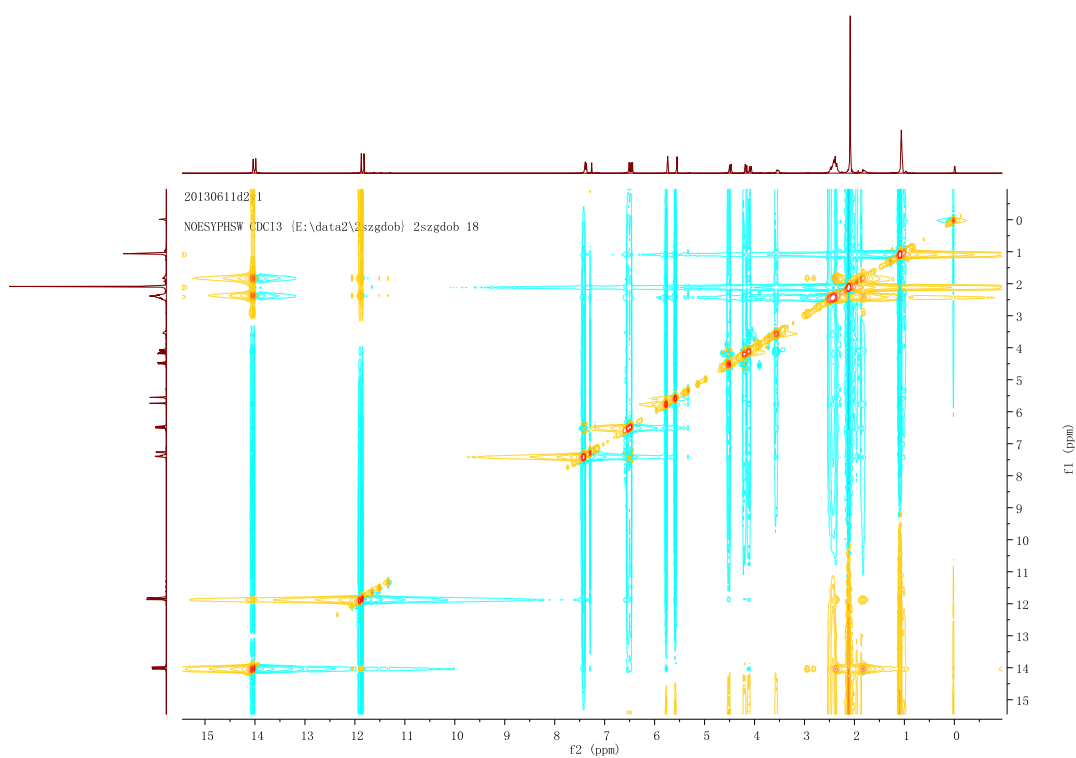

**Figure S15.**  $^1\text{H}$ ,  $^{13}\text{C}$ ,  $^1\text{H}$ - $^1\text{H}$  COSY, HSQC, HMBC, NOE of compound **6**. $^1\text{H}$ 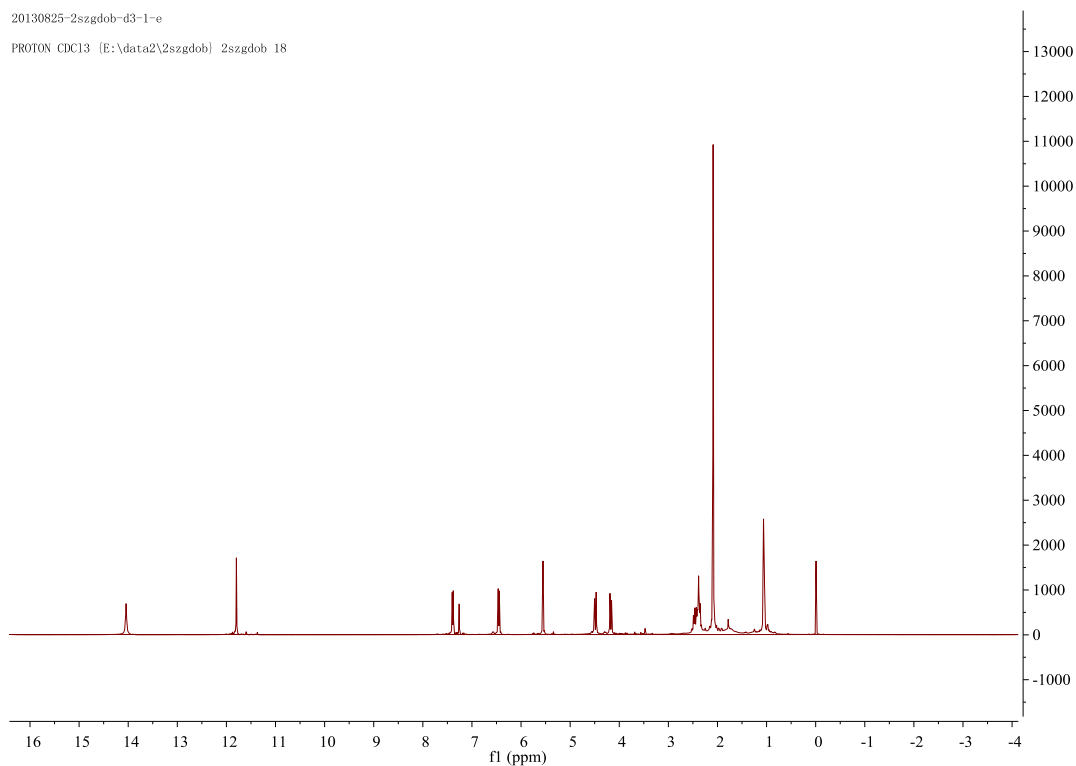 $^{13}\text{C}$ 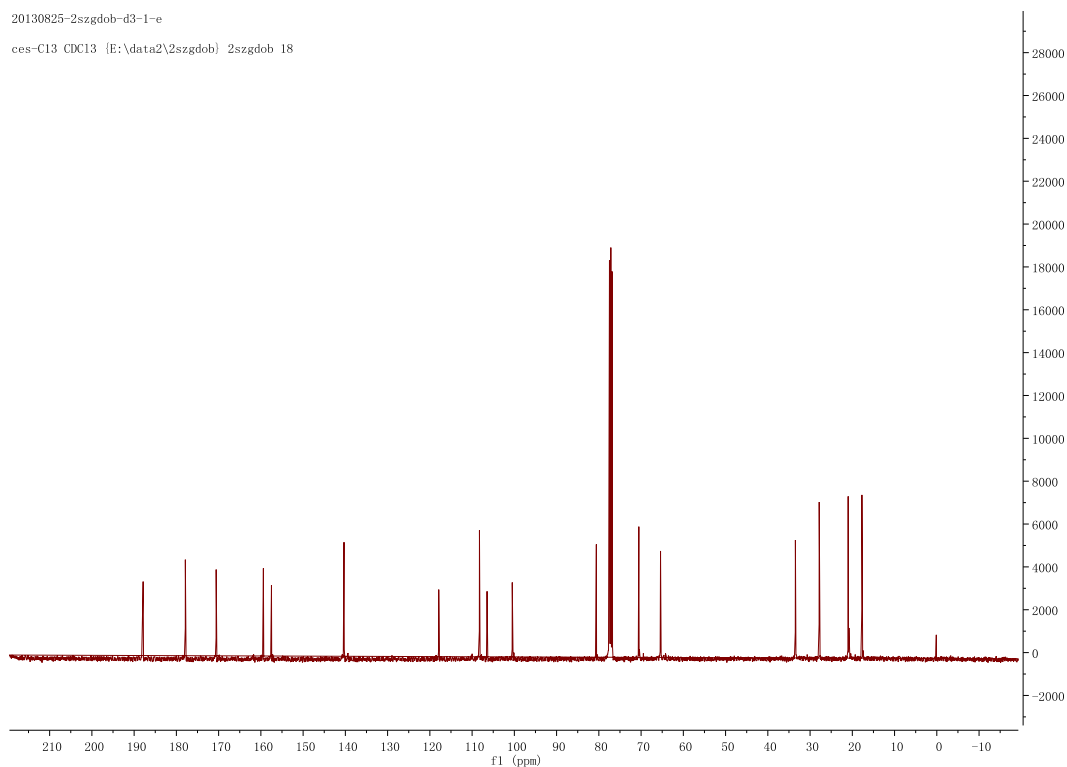

Figure S15. Cont.

$^1\text{H}$ - $^1\text{H}$   
COSY

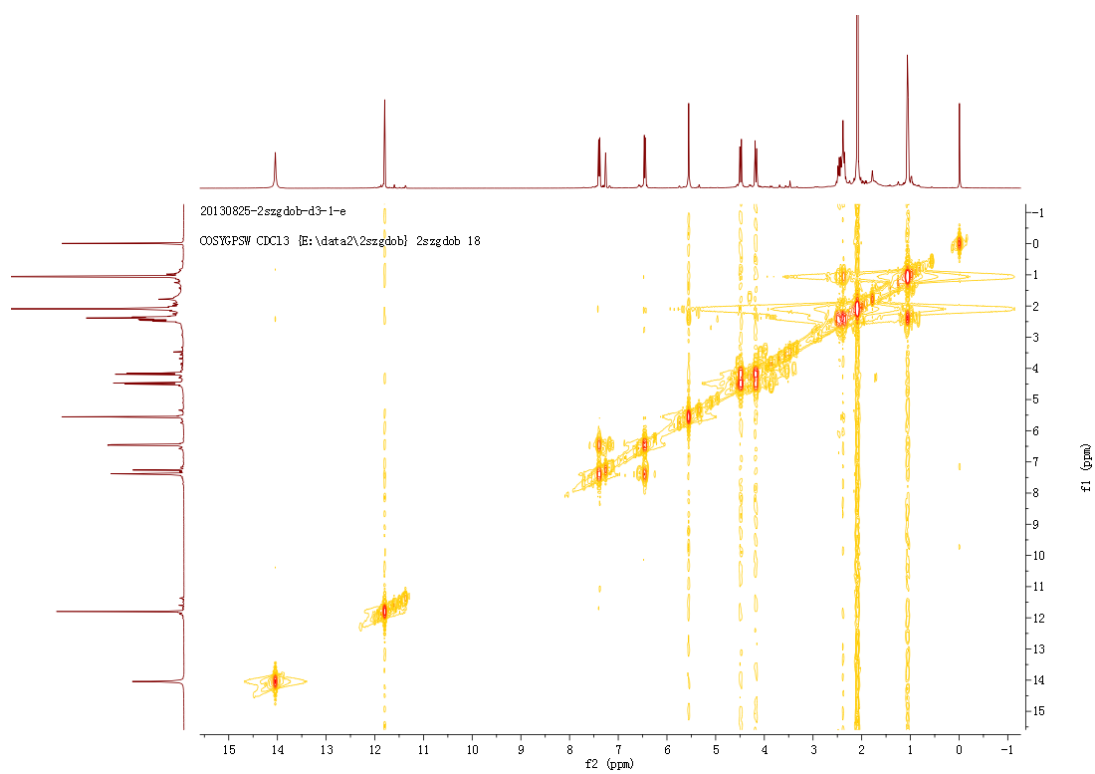

HSQC

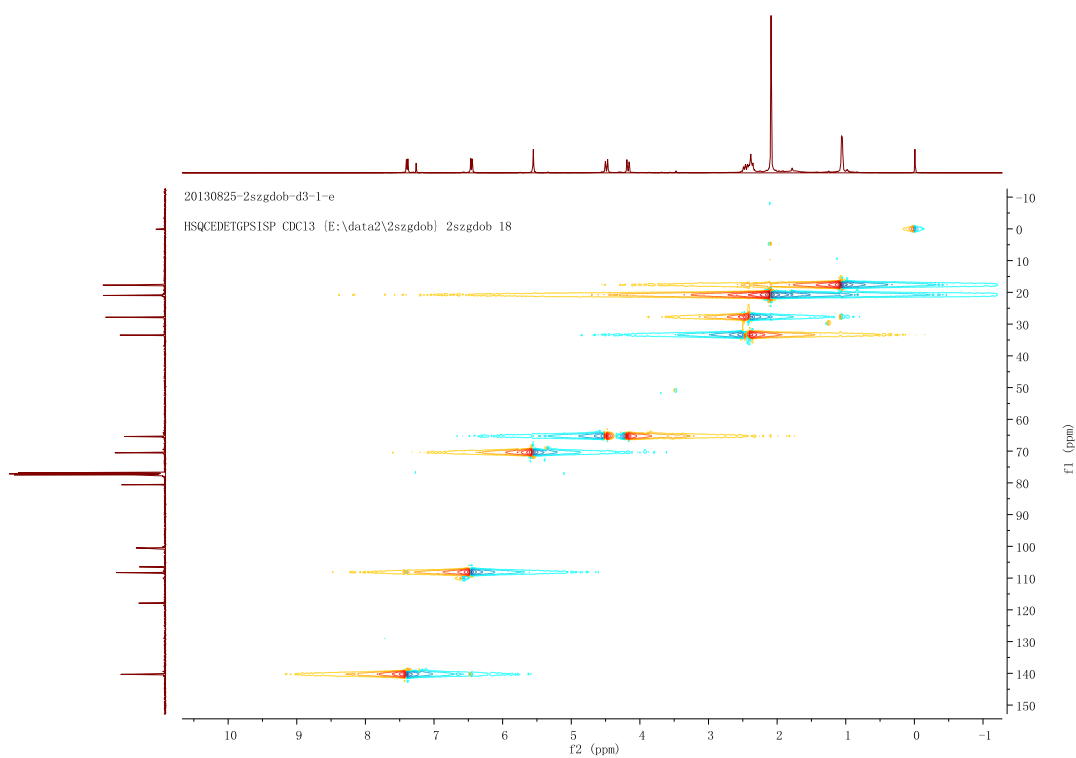

Figure S15. Cont.

HMBC

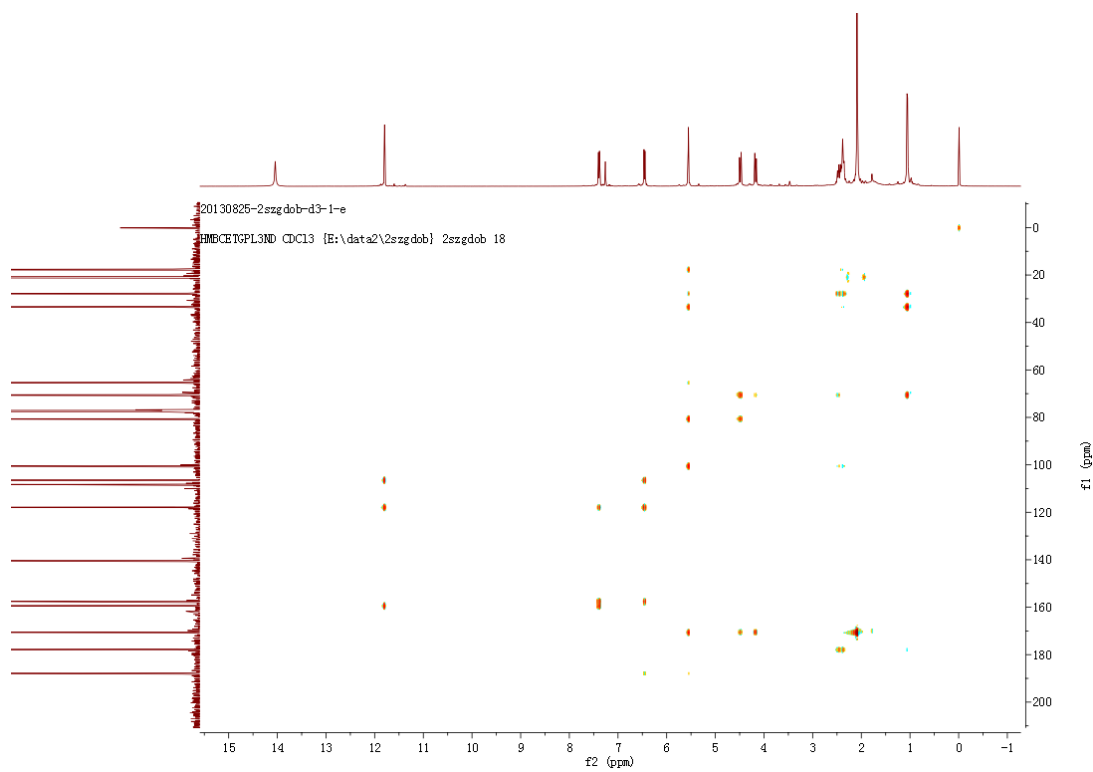

NOE

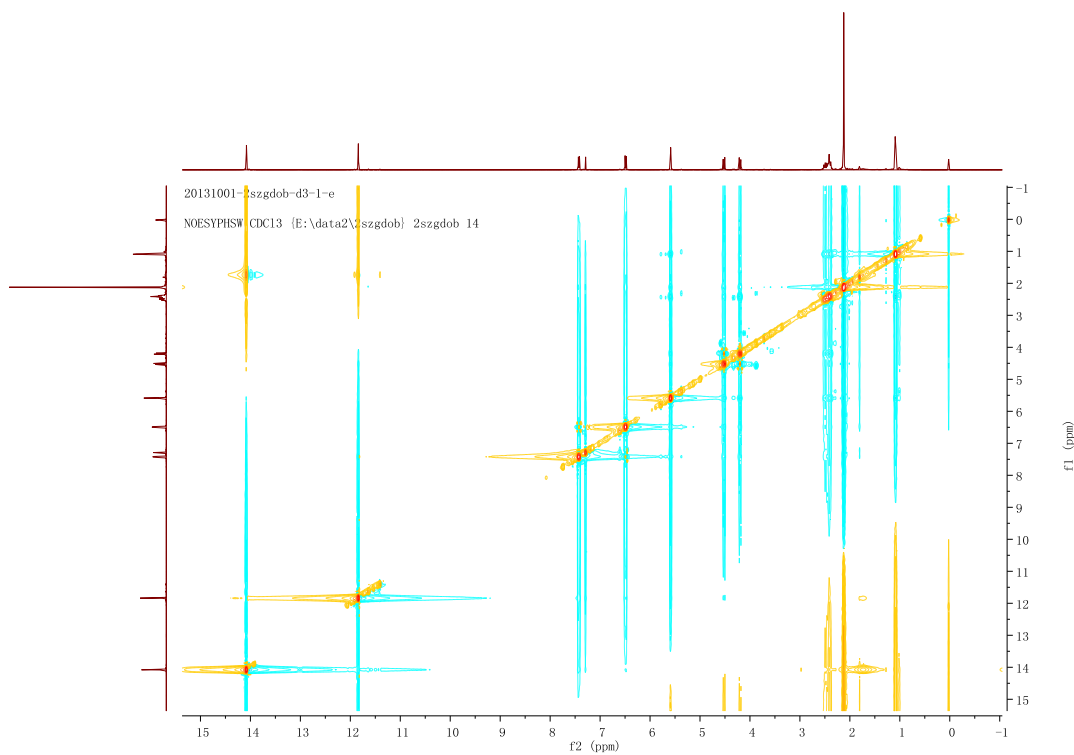

**Figure S16.**  $^1\text{H}$ ,  $^{13}\text{C}$ ,  $^1\text{H}$ - $^1\text{H}$  COSY, HSQC, HMBC, NOE of compound 7. $^1\text{H}$ 1305A0333\_d4yh2  
1305A0333\_d4yh2  
PROTON CDCl3 [E:\data\2013] nmrsu 9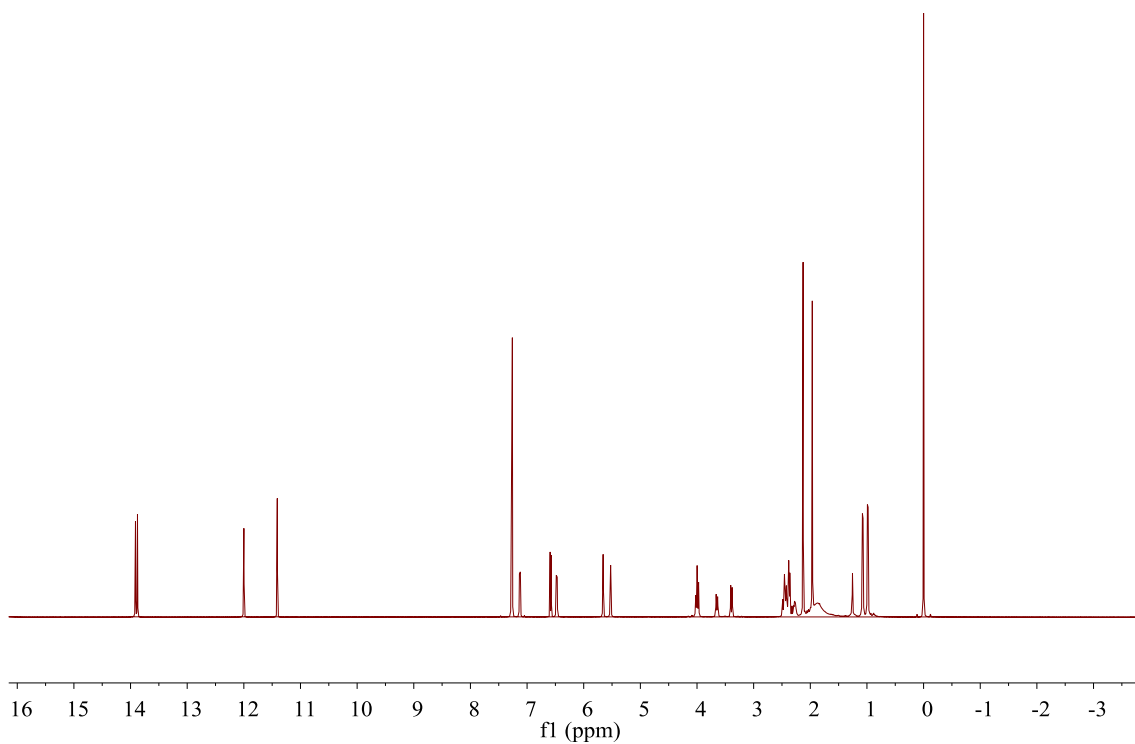 $^{13}\text{C}$ 1305A0333\_d4yh2  
1305A0333\_d4yh2  
C13CFD CDCl3 [E:\data\2013] nmrsu 9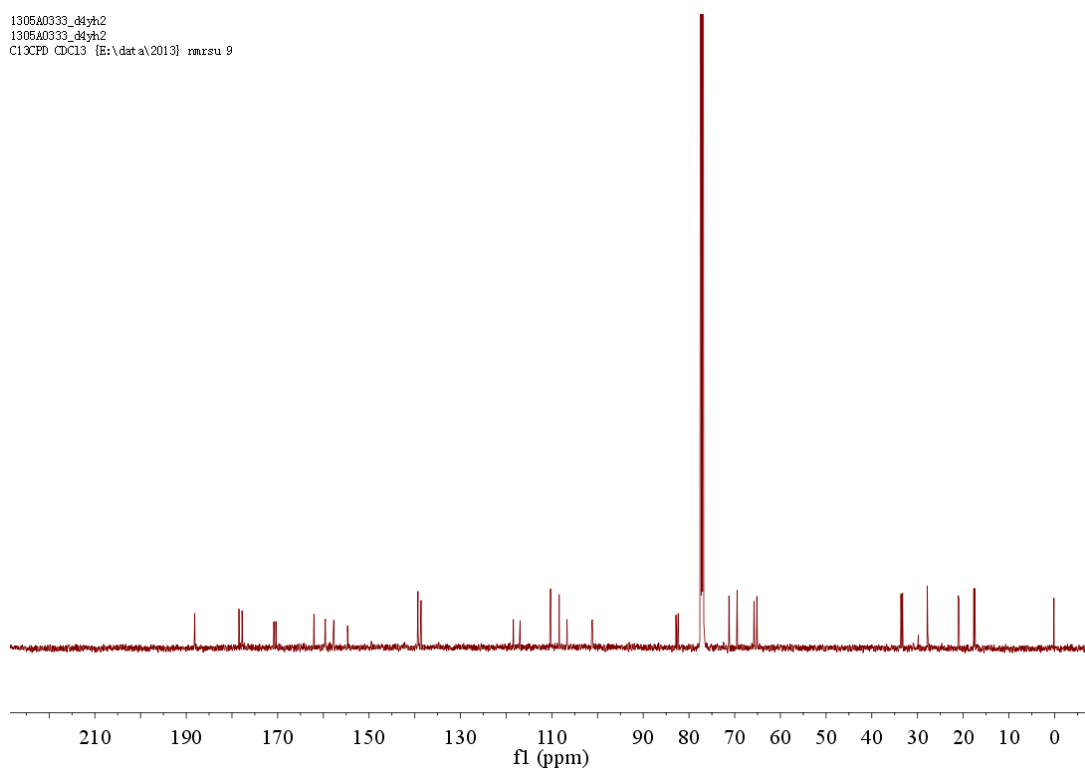

Figure S16. Cont.

 $^1\text{H}$ - $^1\text{H}$   
COSY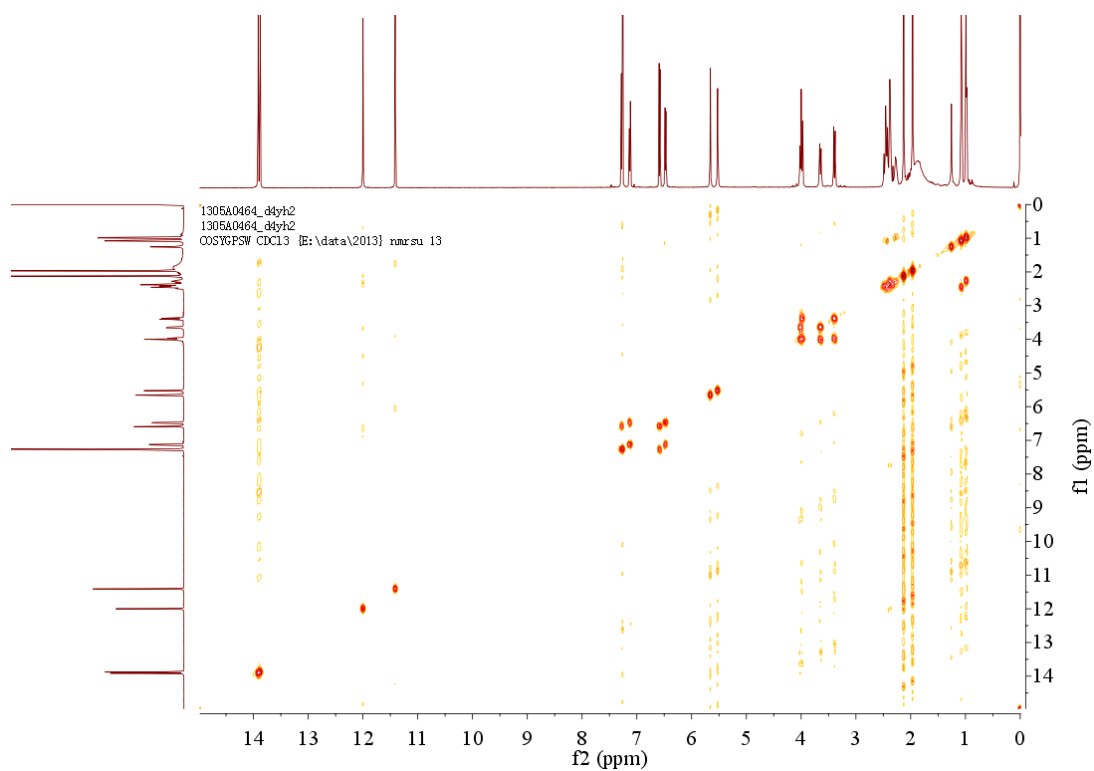

HSQC

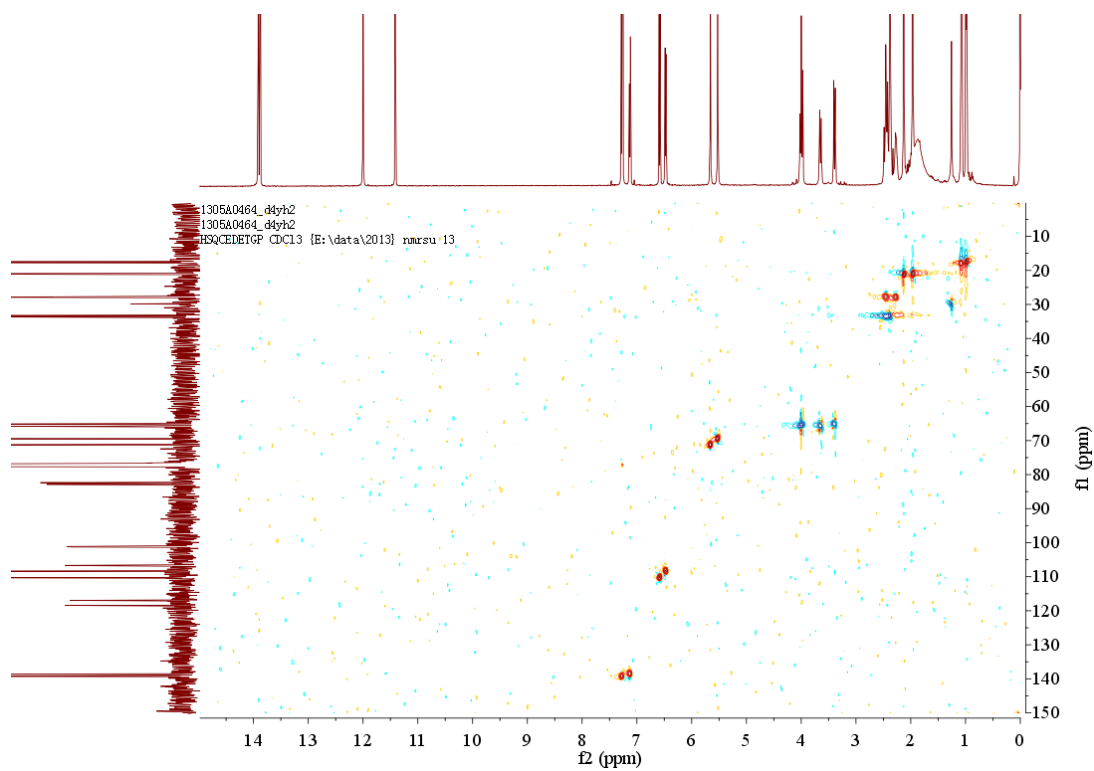



Figure S16. Cont.

HMBC

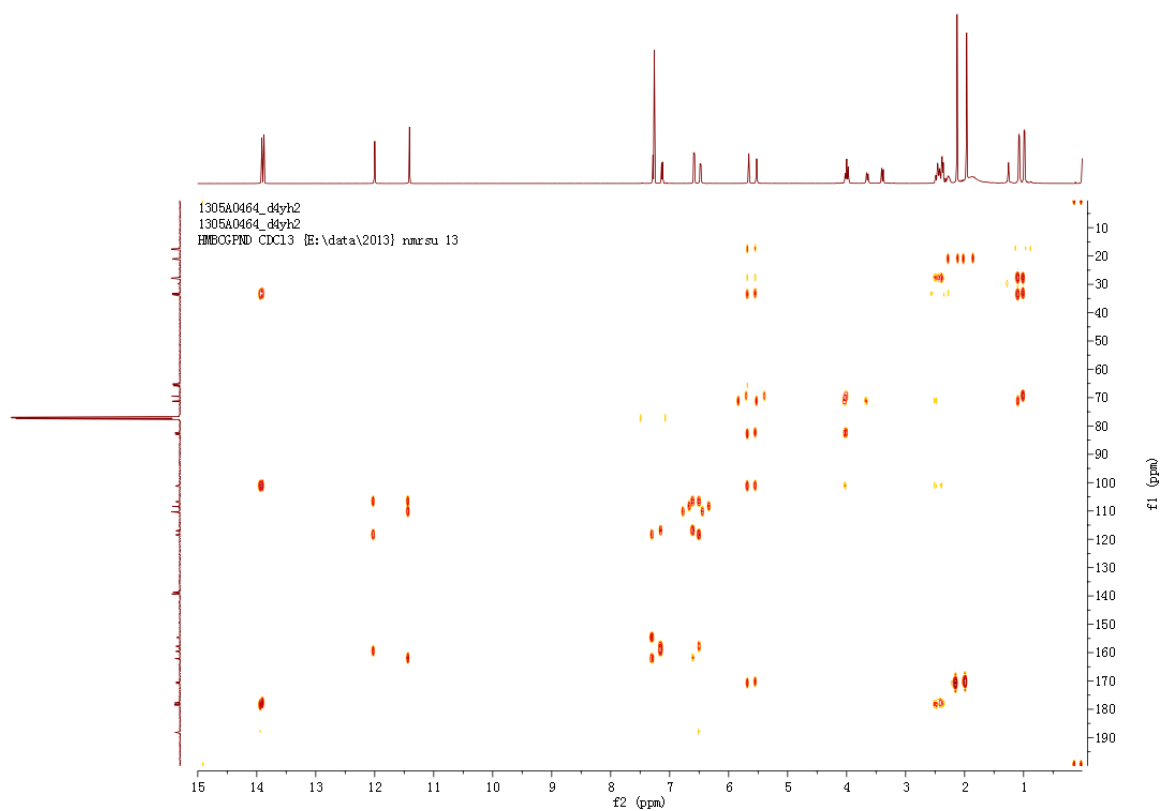

NOE

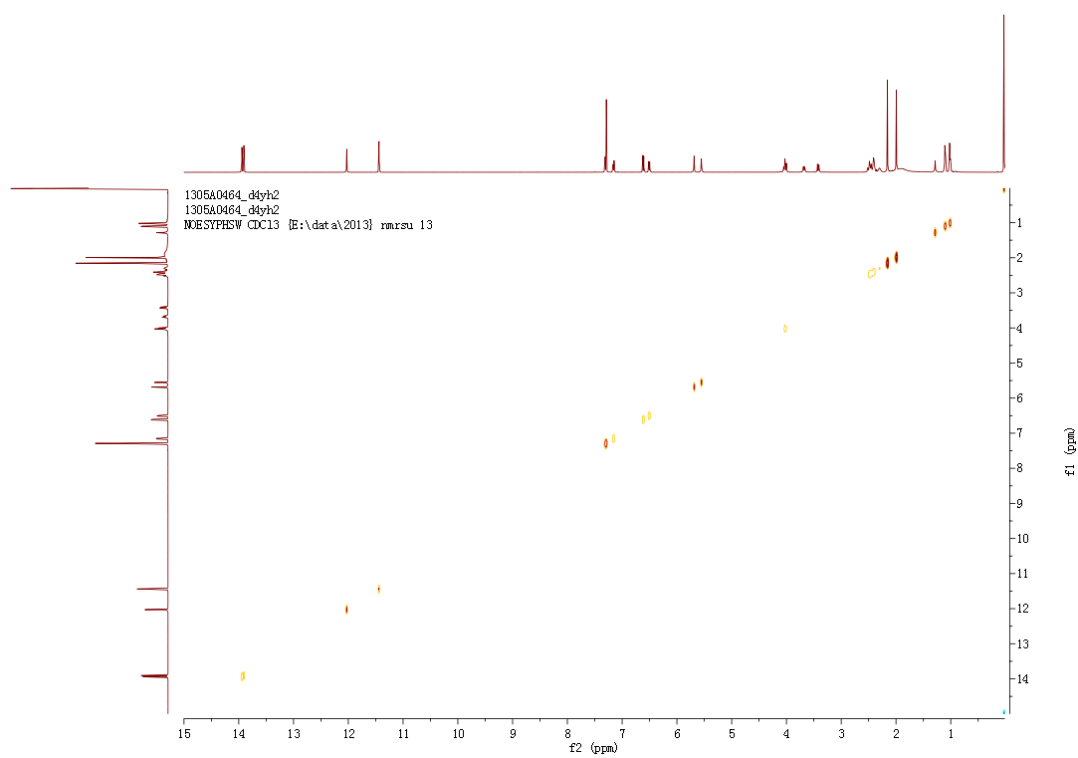

**Figure S17.**  $^1\text{H}$ ,  $^{13}\text{C}$ ,  $^1\text{H}$ - $^1\text{H}$  COSY, HSQC, HMBC, NOE of compound **8**. $^1\text{H}$ 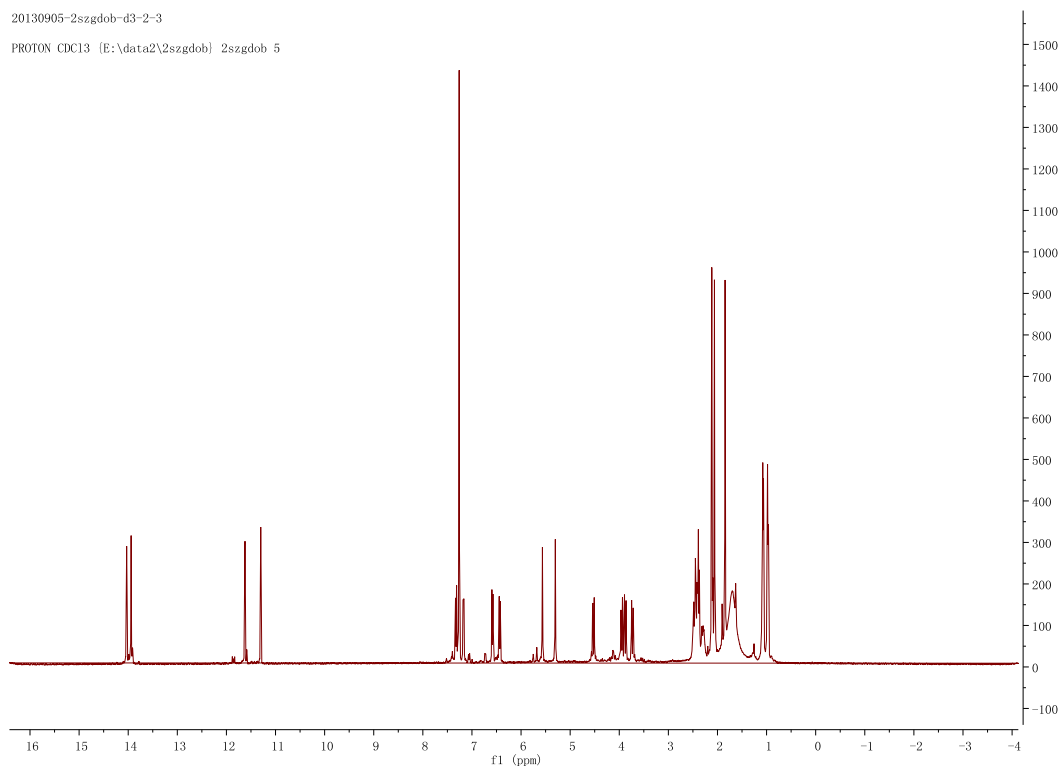 $^{13}\text{C}$ 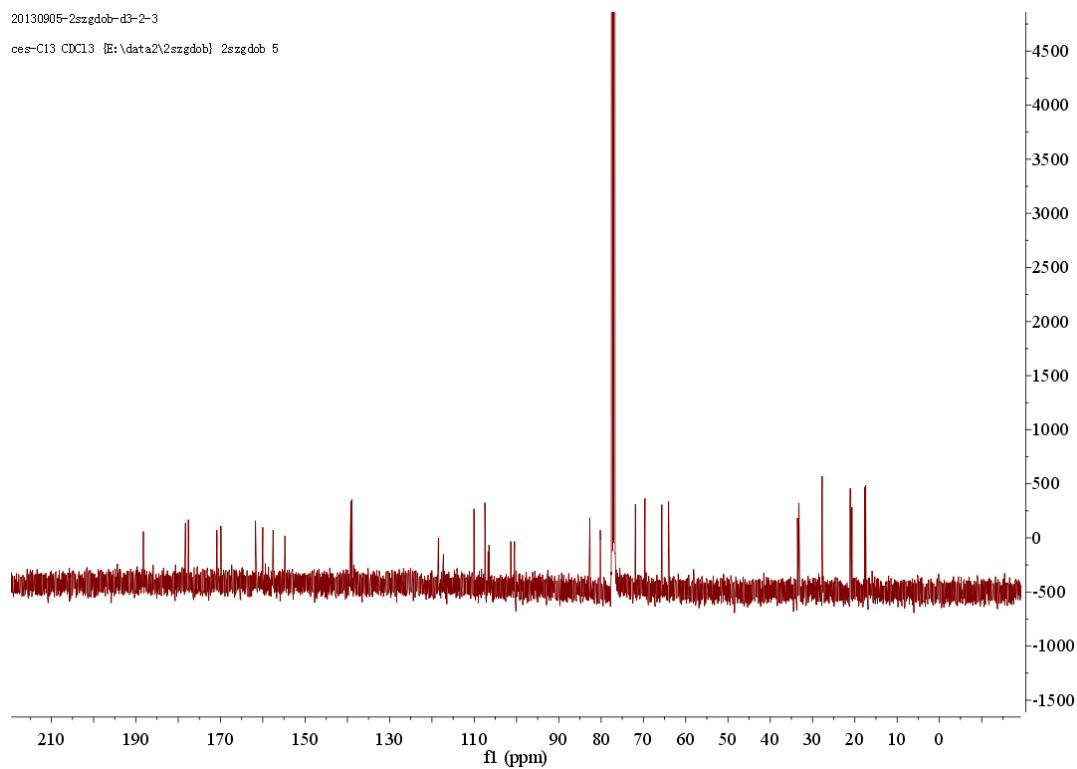

Figure S17. Cont.

 $^1\text{H}$ - $^1\text{H}$   
COSY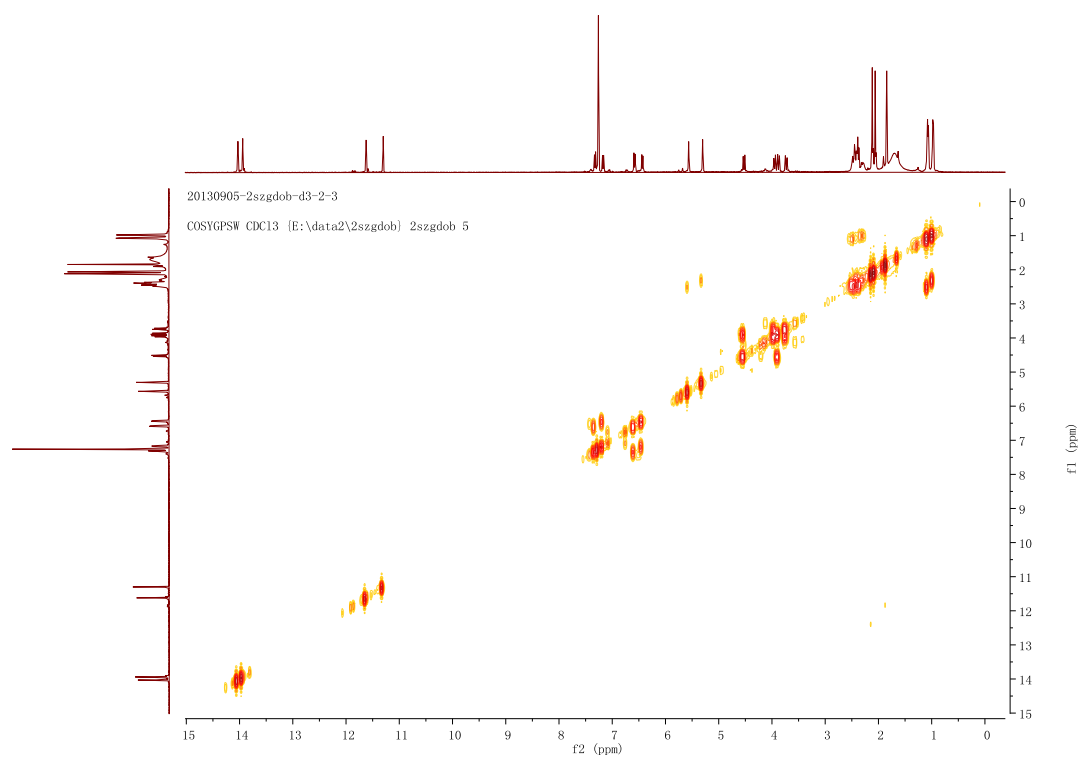

HSQC

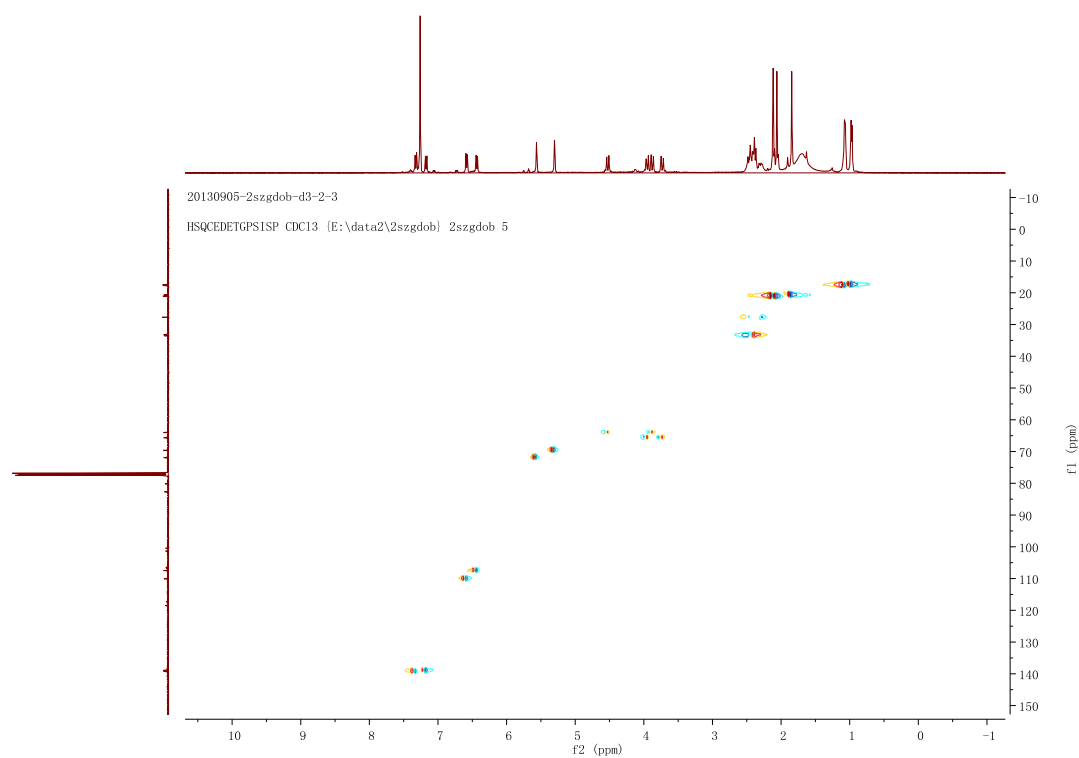

Figure S17. Cont.

HMBC

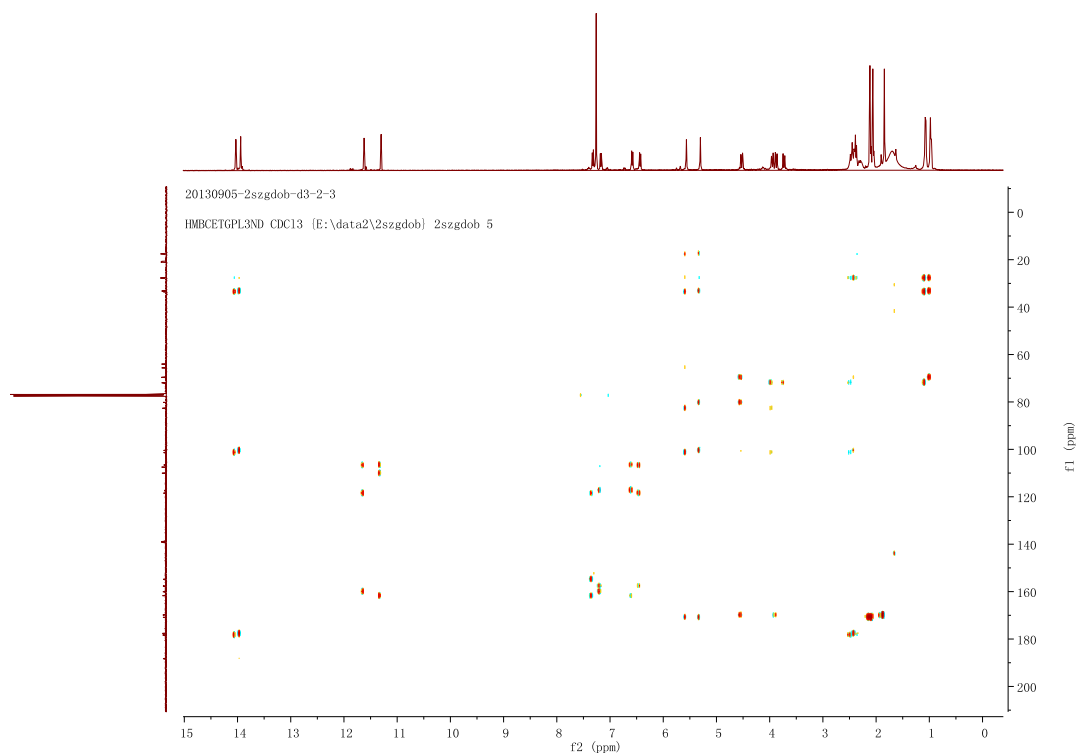

NOE

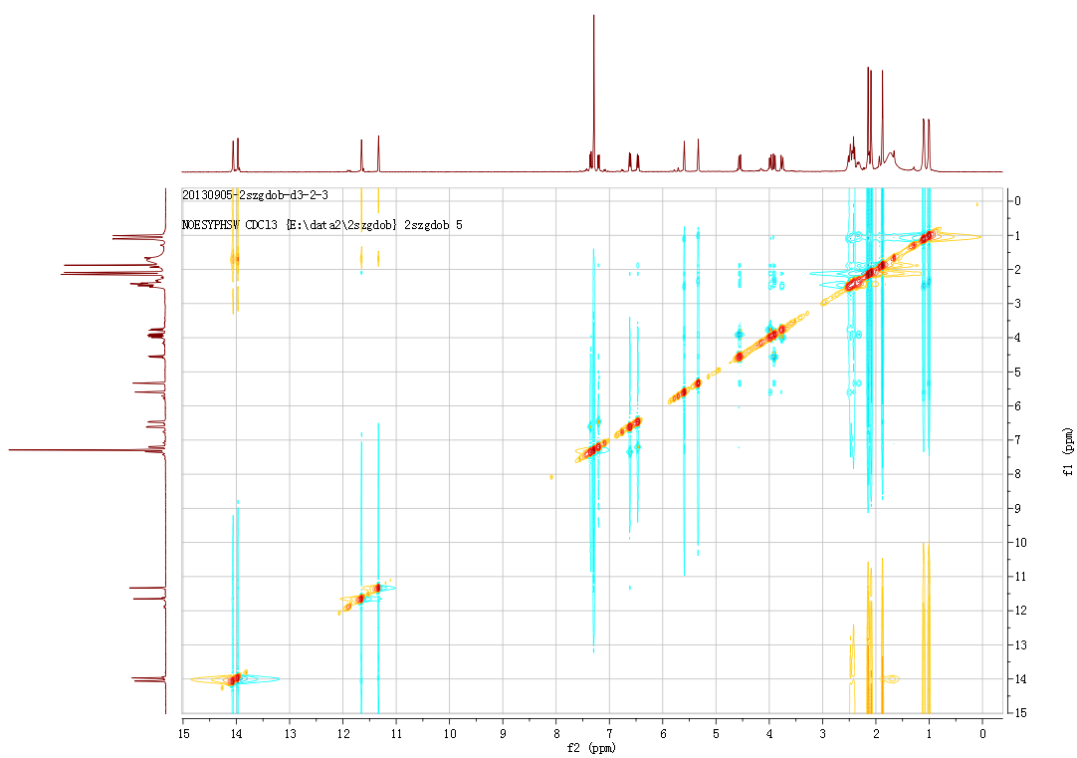

Supplement: marinedrugs-11-04961-s001.pdf [file marinedrugs-11-04961-s001.pdf]
